# Supplementary material
Source: publisher figshare collection journal article supplement (https://acs.figshare.com/ndownloader/files/7503910)
Supplement: Supplementary file 1 [file 7503910]

## Supporting Information

# Combining Aldolases and Transaminases for the Synthesis of 2-Amino-4-Hydroxybutanoic acid

Karel Hernandez, Jordi Bujons, Jesús Joglar, Simon J. Charnock, Pablo Domínguez de María, Wolf-Dieter Fessner and Pere Clapés\*

Dr. Karel Hernandez, Dr. Jordi Bujons, Dr. Jesús Joglar, and Prof. Dr. Pere Clapés. Dept. Chemical Biology and Molecular Modeling. Instituto de Química Avanzada de Cataluña, IQAC-CSIC. Jordi Girona 18-26, 08034 Barcelona, Spain.

Prof. Simon J. Charnock. Prozomix Limited, Station Court, Haltwhistle, Northumberland, NE49 9HN, UK

Dr. habil. Pablo Domínguez de María, Sustainable Momentum S.L., Ap. Correos 3517, 35004, Las Palmas de Gran Canaria, Spain

Prof. Dr. Wolf-Dieter Fessner, Institut für Organische Chemie und Biochemie, Technische Universität Darmstadt, Alarich-Weiss-Str. 4, 64287 Darmstadt, Germany.

Corresponding author: \*E-mail: pere.clapes@iqac.csic.es

| Index                                                                                                                        | Page |
|------------------------------------------------------------------------------------------------------------------------------|------|
| <b>Materials</b>                                                                                                             | S3   |
| <b>Methods</b>                                                                                                               | S3   |
| <b>Activity determination of MBP-YfaU-M<sup>2+</sup></b>                                                                     | S7   |
| <b>Activity determination of (<i>S</i>)- and (<i>R</i>)-selective transaminases</b>                                          | S9   |
| <b>Inhibitory effect of the amount of formaldehyde added (one portion) on the sodium 4-hydroxy-2-oxobutanoate (3) yield.</b> | S10  |
| <b>Influence of the metal cofactor in the aldol addition of</b>                                                              | S11  |

|                                                                                                                                                                                    |     |
|------------------------------------------------------------------------------------------------------------------------------------------------------------------------------------|-----|
| <b>pyruvate to formaldehyde.</b>                                                                                                                                                   |     |
| <b>Effect of metal on the aldol addition of 4-hydroxy-2-oxobutanoate (3) to formaldehyde.</b>                                                                                      | S11 |
| Synthesis of sodium 4-hydroxy-2-oxobutanoate (3).                                                                                                                                  | S12 |
| <b>Reductive amination of 4-hydroxy-2-oxobutanoate (3).<br/>Screening of transaminases.</b>                                                                                        | S13 |
| <b>Determination of equilibrium constant (<math>K_{eq}</math>) for the reductive amination of 4-hydroxy-2-oxobutanoic acid (3) with L-Ala (4) catalyzed by transaminase TA 51.</b> | S13 |
| <b>One-pot biocatalytic cyclic cascade synthesis of L-HOMOSERINE.</b>                                                                                                              | S17 |
| <b>Synthesis of L-homoserine by portion wise addition of formaldehyde.</b>                                                                                                         | S17 |
| <b>Inhibitory effect of the amount of formaldehyde added (portion wise) on the L-homoserine yield in the one-pot cyclic cascade systems after 24 h of reaction.</b>                | S18 |
| <b>Synthesis of L-homoserine by continuous addition of formaldehyde.</b>                                                                                                           | S19 |
| <b>Isolation, purification and determination of enantiomeric excess of synthesized L-and D-homoserine. Formation of Cbz-L- and -D-homoserine lactone.</b>                          | S20 |
| <b>NMR spectra of 4-hydroxy-2-oxobutanoate (3) and sodium 4-hydroxy-3-(hydroxymethyl)-2-oxobutanoate (6).</b>                                                                      | S26 |
| <b>NMR spectra of Cbz-L-homoserine lactone 7.</b>                                                                                                                                  | S28 |
| <b>References</b>                                                                                                                                                                  | S31 |

## Materials

Formaldehyde, L-homoserine, D-homoserine, L-Ala, sodium pyruvate, benzaldehyde and benzyl amine were purchased from Sigma-Aldrich. Reagents for molecular biology were from Life Thermo Scientific. High-density IDA-Agarose 6BCL nickel charged was from GE Healthcare Life Science. Water for analytical HPLC and for the preparation of buffers and other assay solutions was obtained from an Arium pro ultrapure water purification system (SartoriusStedim Biotech). All other solvents used were of analytical grade.

## Methods

*Cloning and expression of 2-keto-3-deoxy-L-rhamnonate aldolase (YfaU EC 4.1.2.53) from E. coli K-12.* The gene rhmA from *E. coli* K-12 (NCBI database accession number NC\_000913.3) was amplified by PCR from genomic DNA and cloned into pQE40MBP (MBP maltose binding protein) using KpnI and HindIII with the primers: Forward: 5'-AGGTACCATGAACGCATTATTAAGCAATCCC-3'. Reverse and complementary: 5'-CAATAAGCTTTCAATAACTACCTTTTATGCGTGGCC-3' (Figure S1). The plasmid pQE40 MBP-YfaU was transformed into an *E. coli* strain M-15 [pREP-4] from QIAGEN and grown in LB medium with ampicillin ( $100\text{ }\mu\text{g mL}^{-1}$ ) plus kanamycin ( $25\text{ }\mu\text{g mL}^{-1}$ ) at  $37\text{ }^{\circ}\text{C}$  on a rotary shaker at 200 rpm. A final optical density at 600 nm ( $\text{OD}_{600}$ ) of 2–3 was usually achieved. An aliquot of the pre-culture (12 mL) was transferred into a shake-flask (2 L) containing LB (600 mL) with ampicillin ( $100\text{ }\mu\text{g mL}^{-1}$ ) plus kanamycin ( $25\text{ }\mu\text{g mL}^{-1}$ ) and incubated at  $37\text{ }^{\circ}\text{C}$  with shaking at 200 rpm. During the middle exponential phase growth ( $\text{DO}_{600} \approx 0.5$ ), the temperature was decreased to  $20\text{ }^{\circ}\text{C}$  to minimize potential inclusion bodies formation and isopropyl- $\beta$ -D-1-thiogalactopyranoside (IPTG; 1 mM final concentration) was added. Cells from the induced-culture broths (3 L) were centrifuged at  $12\text{ }000\text{ g}$  for 30 min at  $4\text{ }^{\circ}\text{C}$ . The pellet was re-suspended with starting sodium phosphate buffer (200 mL, 50 mM, pH 8.0), containing NaCl (300 mM) and imidazole (10 mM). Cells were lysed using a cell disrupter (Constant Systems). Cellular debris was removed by centrifugation at  $30\text{ }000\text{ g}$  for 30 min. The clear supernatant was collected and purified by immobilized metal ion affinity chromatography (IMAC) using a FPLC system (Amersham biosciences). The crude supernatant was applied to a cooled HR 16/40 column (GE Healthcare) packed with HiTrap chelating support (50 mL bed volume; Amersham Biosciences) and washed with the start buffer (250 mL). The protein was eluted with sodium phosphate

buffer (50 mM, pH 8.0) containing NaCl (300 mM) and imidazole (500 mM) at a flow rate of 3 mL min<sup>-1</sup>. Fractions containing the recombinant protein were combined and dialyzed against sodium phosphate buffer (10 mM, pH 7.0) at 4 °C. The dialyzed solution was frozen at – 80 °C and lyophilized. The white solid obtained (yield: 130 mg L<sup>-1</sup> of culture) was stored at – 20 °C. See Figure S2 for the Coomassie Blue-stained SDS-PAGE of MBP-YfaU.

MRGSHHHHHHGSGIMKIEEGKLVWINGDKGYNGLAEVGKKFEKDTGIKVTVE  
 HPDKLEEKFPQVAATGDGPDIIFWAHDRFGGYAQSGLLAEITPDKAFQDKLYPF  
 TWDAVRYNGKLIAYPIAVEALSLIYNKDLLPNPPKTWEEIPALDKELKAKGKSA  
 LMFNLQEPYFTWPLIAADGGYAFKYENGKYDIKDVGVDNAGAKAGLTFLVDLI  
 KNKHMNADTDYSIAEAAFNKGETAMTINGPWAWSNIDTSKVNYGVTVLPTFK  
 GQPSKPFVGVLSAGINAASPNKELAKEFLENYLLTDEGLEAVNKDKPLGAVAL  
 KSYEEELAKDPRIAATMENAQKGEIMPNIQMSAFWYAVRTAVINAASGRQTV  
 DEALKDAQTSSTGLEVLFQGPACGTMNALLSNPFKERLRKGEVQIGLWLSSTTA  
 YMAEIAATSGYDWLLIDGEHAPNTIQDLYHQLQAVAPYASQPVIRPVEGSKPLI  
 KQVLDIGAQTLLIPMVDTAEQARQVVSATRYPPYGERGVGASVARAARWGRIE  
 NYMAQVNDLCLLVQVESKTALDNLDEILDVEGIDGVFIGPADLSASLGYPDN  
 AGHPEVQRIIETSIRIRAAAGKAAGFLAVAPDMAQQCLAWGANFVAVGVDTML  
 YSDALDQRLAMFKSGKNGPRIKGSY

**Figure S1.** Sequence of fused maltose binding protein (MBP) and 2-keto-3-deoxy-L-rhamnonate aldolase (YfaU) (MBP-YfaU). MBP (blue), YfaU (green), 6x His tag (red) and recognition and cleavage site for human rhinovirus 3C and PreScission proteases (orange).

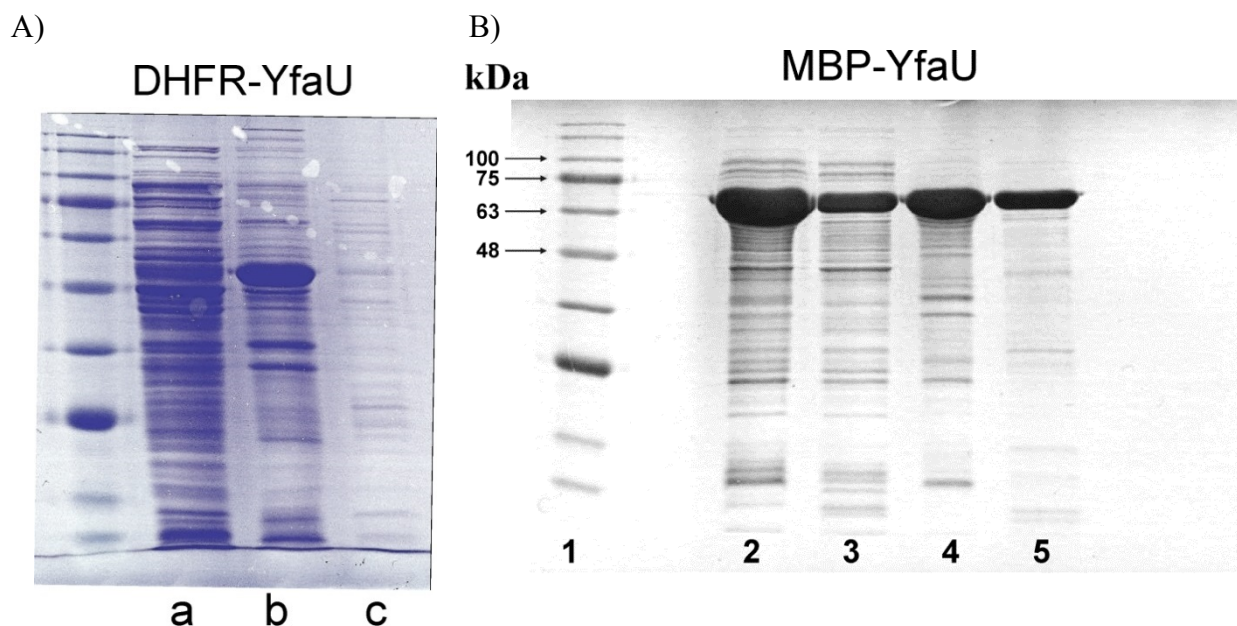

**Figure S2.** Coomassie Blue-stained SDS-PAGE of DHFR-YfaU (A) and MBP-YfaU (B). The gel was loaded with samples of DHFR-YfaU (A) from supernatant after centrifugation of cell debris (lane a), Pellet (lane b) and purified (lane c) and MBP-YfaU from crude extract (lane 2), supernatant of lysis (lane 3), pellet after lysis and centrifugation (lane 4), and eluate of affinity chromatography (IMAC) (lane 5). The molecular masses of the proteins in the standard (lane 1) are as indicated. The predicted molecular mass of MBP-YfaU is 72 kDa.

*HPLC analysis.* HPLC analyses were performed on a RP-HPLC XBridge<sup>®</sup> C18, 5  $\mu$ m, 4.6  $\times$  250 mm column (Waters). The solvent system used was: solvent (A): 0.1% (v/v) trifluoroacetic acid (TFA) in H<sub>2</sub>O and solvent (B): 0.095% (v/v) TFA in CH<sub>3</sub>CN/H<sub>2</sub>O 4:1, flow rate 1 mL min<sup>-1</sup>, detection at 215 nm and column temperature at 30 °C. The amount of products and substrates were quantified from the peak areas using an external standard methodology.

Reaction monitoring for pyruvate (1), formaldehyde (2) and aldol adduct (3) were carried out as follows: samples were withdrawn from the reaction mixture (10  $\mu$ L) and diluted with plain water, to obtain a concentration range between 3 and 50 mM. Then, the dilution (10  $\mu$ L) was mixed with a solution of *O*-benzylhydroxylamine hydrochloride (50  $\mu$ L of a 0.13 mM stock solution in pyridine:methanol:water 33:15:2). After incubation at 25 °C for 5 min, samples were diluted in methanol (500  $\mu$ L) and

after centrifugation analyzed by HPLC. Elution conditions: gradient elution from 10 to 100% B over 30 min (Figure S3).

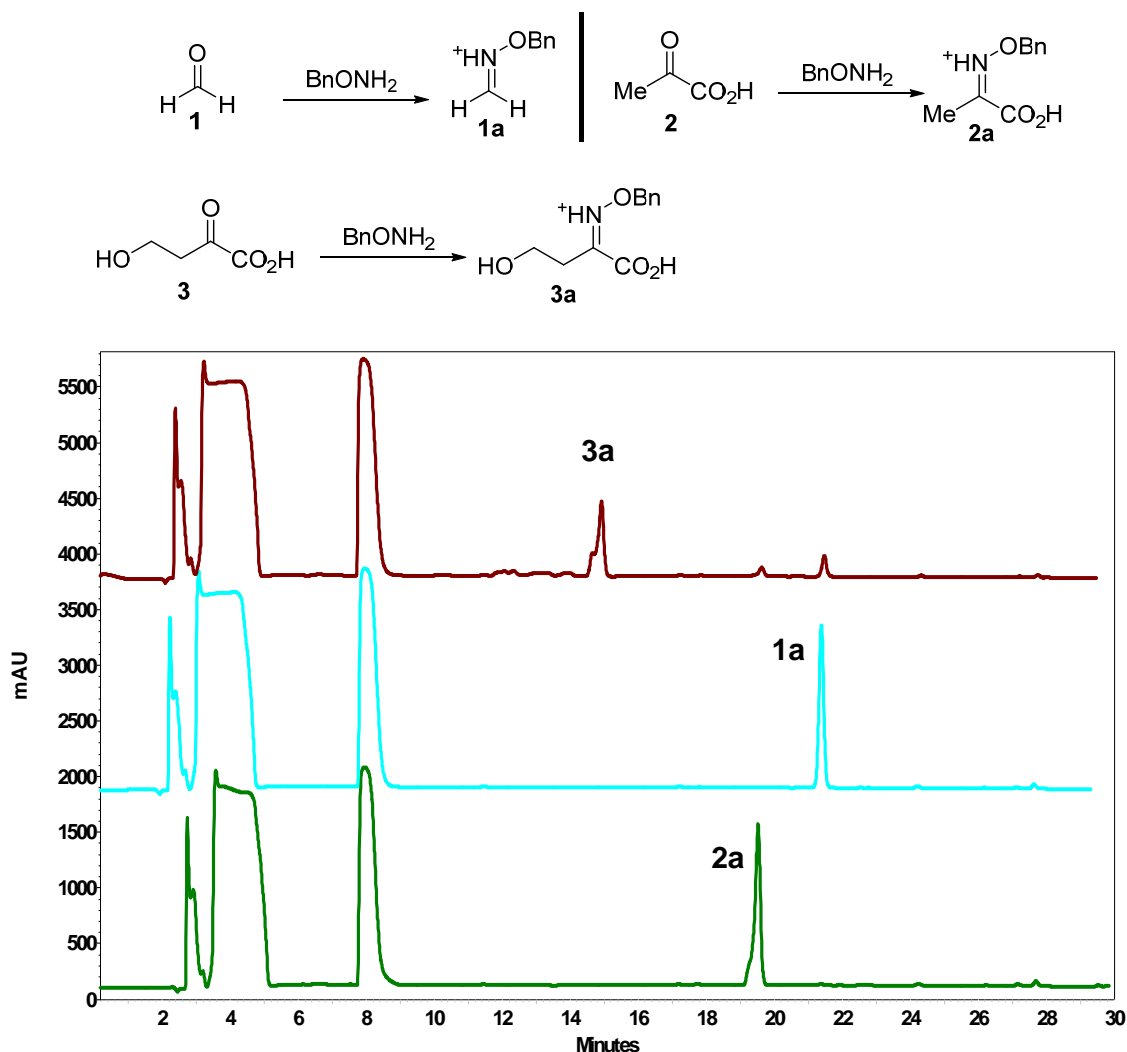

**Figure S3.** Example of HPLC chromatogram of *O*-benzylhydroxylamine derivatives of pyruvate (**1a**), formaldehyde (**2a**) and aldol adduct (**3a**).

Reaction monitoring for L-Ala (**4**) and L-homoserine (**5**) were carried out as follows: samples were withdrawn from the reaction mixture (10  $\mu$ L) and diluted with plain water, to obtain a concentration range between 3 and 50 mM. Then the dilution (10  $\mu$ L) was mixed with a solution of CbzOSu (50  $\mu$ L of a 150 mM stock solution in acetonitrile). After incubation at 60  $^{\circ}$ C for 60 min, samples were diluted in methanol (440  $\mu$ L) and after centrifugation analyzed by HPLC. Elution conditions: gradient elution from 10 to 100 % B over 30 min (Figure S4).

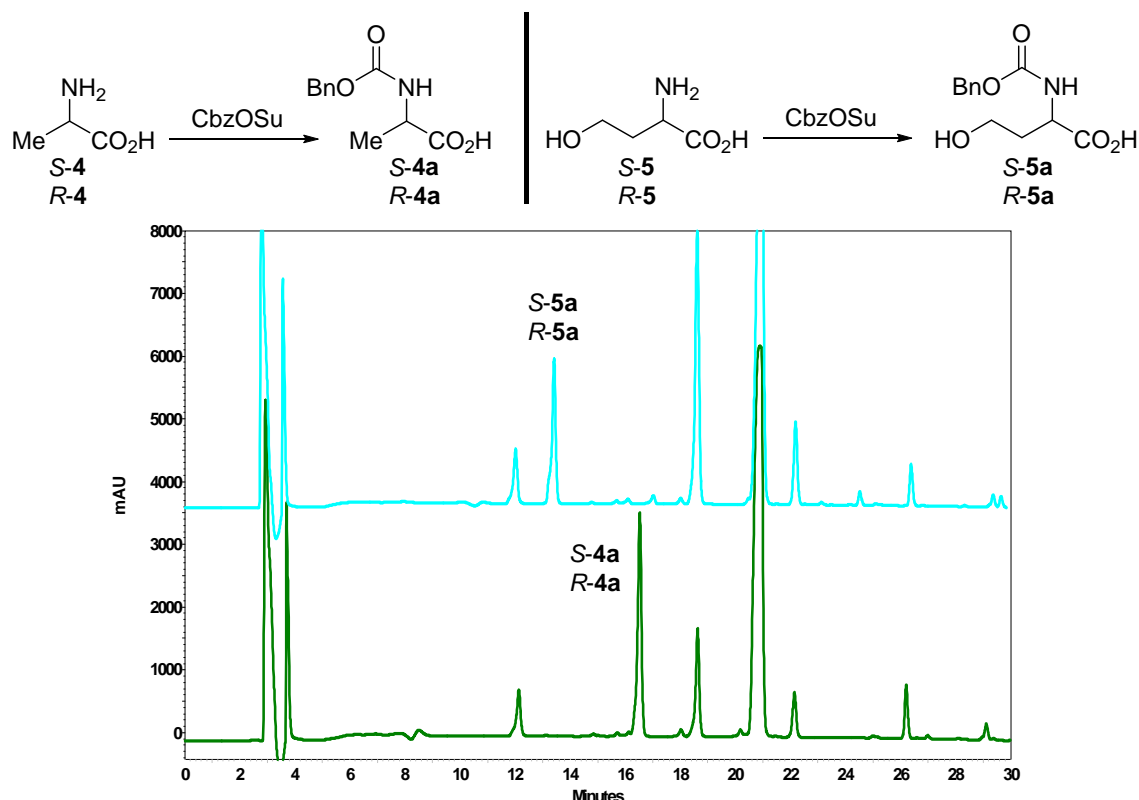

**Figure S4.** Examples of HPLC analysis of Cbz-L- or -D-Ala (**S-4a** or **R-4a**, respectively) and Cbz-L- or -D-homoserine (**S-5a** or **R-5a**, respectively) derivatives.

*NMR analysis.* Routine,  $^1\text{H}$  (400 MHz) and  $^{13}\text{C}$  (101 MHz) NMR spectra of compounds were recorded with a Varian Mercury-400 spectrometer. Full characterization of the described compounds was performed using typical gradient-enhanced 2D experiments: COSY, NOESY, HSQC, HMBC and TOCSY, recorded under routine conditions.

*Chiral HPLC analysis.* Enantiomeric excesses (*ee*) were determined with chiral HPLC analysis on a CHIRALPAK<sup>®</sup> ID, 46 x 250 mm column, 5  $\mu\text{m}$ , flow rate 0.8 mL min<sup>-1</sup> at 20 °C and UV detection (254 nm). The solvent for isocratic elution was: hexane/EtOH/CH<sub>2</sub>Cl<sub>2</sub>, 7/2/1 (v/v/v). *Specific rotation* values were measured with a Perkin Elmer Model 341 (Überlingen, Germany).

**Activity determination of MBP-YfaU- $\text{M}^{2+}$ .** The activity was determined using the aldol addition of pyruvate to formaldehyde by a discontinuous assay. One unit of activity was defined as the amount of MBP-YfaU, which catalyzes the formation of 1  $\mu\text{mol}$  of 4-hydroxy-2-oxobutanoic acid (**3**) per min at 25 °C in 50 mM sodium phosphate buffer pH 7.0, containing 1 mM of different cations ( $\text{Ni}^{2+}$ ,  $\text{Co}^{2+}$  and  $\text{Mg}^{2+}$ ). The assay procedure

was as follows: To a equimolar solution mixture of sodium pyruvate and formaldehyde (150  $\mu\text{L}$  of a 133 mM solution in 50 mM sodium phosphate buffer pH 7.0 containing  $\text{MCl}_2$  (1.3 mM)), a solution of the enzyme (50  $\mu\text{L}$ , of stock solution between 5.4–0.08 mg of lyophilized powder  $\text{mL}^{-1}$ , in 50 mM sodium phosphate buffer pH 7.0) was added. The total reaction volume was 0.2 mL. Reaction monitoring was as follows: at 10 min, samples (10  $\mu\text{L}$ ) were analyzed by HPLC as described above. The results are presented in Table S1 and Figure S5.

**Table S1.** Activity of MBP-YfaU- $\text{M}^{2+}$  with different metal cofactors.

| Metal cofactor                | Activity <sup>a</sup> ( $\text{U mg}^{-1}$ ) |
|-------------------------------|----------------------------------------------|
| $\text{Co}^{2+}$              | 10.0                                         |
| $\text{Ni}^{2+}$              | 7.8                                          |
| $\text{Mg}^{2+}$              | 3.9                                          |
| Without $\text{M}^{2+}$ added | 2.5                                          |

<sup>a</sup>One unit of activity was defined as the amount of MBP-YfaU, which catalyzes the formation of 1  $\mu\text{mol}$  of 4-hydroxy-2-oxobutanoic acid (**3**) per min at 25  $^{\circ}\text{C}$  in 50 mM sodium phosphate buffer pH 7.0, with or without the addition of  $\text{Ni}^{2+}$ ,  $\text{Co}^{2+}$  or  $\text{Mg}^{2+}$  (1 mM). The activity of the MBP-YfaU without  $\text{M}^{2+}$  added was lower than that with  $\text{Mg}^{2+}$  added due to that enzyme not being saturated by metal cofactor.

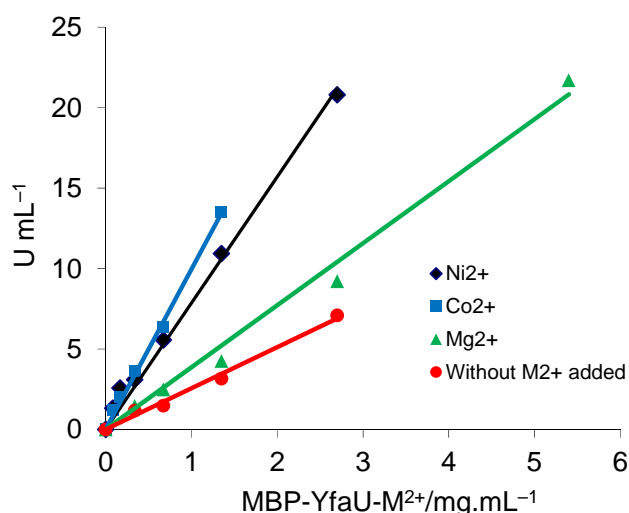

**Figure S5.** Determination of MBP-YfaU- $\text{M}^{2+}$  activity. 4-Hydroxy-2-oxobutanoic acid (**3**) formed in 10 min ( $\mu\text{mol min}^{-1} \text{mL}^{-1}$ ) against the MBP-YfaU- $\text{M}^{2+}$  concentration in mg lyophilized powder  $\text{mL}^{-1}$ .



**Activity determination of (*S*)-selective transaminases.** TA20, 26, 39 and 51. The activity (Table S2) was determined using the reductive amination of pyruvate to L-alanine using benzylamine as amine donor by a fixed-time (discontinuous) assay. One unit of activity was defined as the amount of TA, which catalyzes the formation of 1  $\mu\text{mol}$  of benzaldehyde per min at 25 °C in sodium phosphate buffer (50 mM; pH 7.0, containing 1 mM of PLP). The assay procedure was as follows: To an equimolar solution of sodium pyruvate and benzylamine (172  $\mu\text{L}$  of a 174 mM stock solution in 50 mM sodium phosphate buffer pH 7.0 containing PLP (1 mM)), a solution of the enzyme (128  $\mu\text{L}$  of a stock solutions between 0.15–20.0 mg of lyophilized powder  $\text{mL}^{-1}$  in 50 mM sodium phosphate buffer pH 7.0 containing PLP (1 mM)) was added. Total final volume was 0.3 mL. Reaction monitoring was as follows: at 10 min, samples (100  $\mu\text{L}$ ) were withdrawn, diluted with methanol (400  $\mu\text{L}$ ), and directly analyzed and quantified by HPLC using an external standard method, gradient elution from 10 to 100 % B.

**Table S2.** Activity of (*S*)-Selective Prozomix TAs.

| Prozomix TA | Activity <sup>a</sup> (U $\text{mg}^{-1}$ ) |
|-------------|---------------------------------------------|
| 20          | 0.061                                       |
| 26          | 0.17                                        |
| 39          | 0.035                                       |
| 51          | 0.14                                        |

<sup>a</sup>One unit of activity was defined as the amount of TA, which catalyzes the formation of 1  $\mu\text{mol}$  of benzaldehyde per min at 25 °C in sodium phosphate buffer (50 mM; pH 7.0, containing 1 mM of PLP).

**Activity determination of (*R*)-Selective transaminases.** TA7, 17, and 43. The transamination reaction of benzylamine to pyruvate did not work with these transaminases. Therefore, the procedure used in this case was the following. The activity (Table S3) was determined using the reductive amination of 4-hydroxy-2-oxobutanoic acid (**3**) to D-homoserine using D-Ala as amine donor by a fixed-time (discontinuous) assay. One unit of activity was defined as the amount of TA, which catalyzes the formation of 1  $\mu\text{mol}$  of pyruvate per min at 25 °C in sodium phosphate buffer (50 mM; pH 7.0, containing 1 mM of PLP). The assay procedure was as

follows: To a solution of **3** and D-Ala (134 mM and 671 mM respectively in sodium phosphate buffer pH 7.0 containing PLP (1 mM)), a solution of the enzyme (51  $\mu$ L of a stock solutions between 0.15–20.0 mg of lyophilized powder  $\text{mL}^{-1}$  in 50 mM sodium phosphate buffer pH 7.0 containing PLP (1 mM)) was added. Total final volume was 0.2 mL. Reaction monitoring was as follows: at 10 min, samples (10  $\mu$ L) were withdrawn and analyzed by HPLC as describe above for pyruvate.

**Table S3.** Activity of (*R*)-Selective Prozomix TA.

| Prozomix TA | Activity <sup>a</sup> (U $\text{mg}^{-1}$ ) |
|-------------|---------------------------------------------|
| 7           | 2.4                                         |
| 17          | 5.8                                         |
| 43          | 2.3                                         |

<sup>a</sup>One unit of activity was defined as the amount of TA, which catalyzes the formation of 1  $\mu$ mol of pyruvate per min at 25 °C in sodium phosphate buffer (50 mM; pH 7.0, containing 1 mM of PLP).

***Inhibitory effect of the amount of formaldehyde added (one portion) on the sodium 4-hydroxy-2-oxobutanoate (3) yield.*** Formaldehyde (0.05 to 1.5 mmol, 4  $\mu$ L to 122  $\mu$ L of a 12.3 M commercial aqueous solution, 0.1 to 2.4 M in the reaction mixture) was dissolved in 50 mM sodium phosphate buffer pH 7.0 (0.25 mL) containing sodium pyruvate (0.1 to 3.0 M). An equimolar amount of pyruvate and formaldehyde were used in all experiments. The reactions were started by addition of MBP-YfaU( $\text{Mg}^{2+}$ ) (0.25 mL, 2 mg lyophilized powder  $\text{mL}^{-1}$  in the reaction mixture). The reactions were stirred (1000 rpm vortex mixer) at 25 °C and analyzed by HPLC after 24 h. Data of Figure 1 in main text were adjusted to inhibitory dose-response model with variable Hill slope using GraphPad Prism 5 software (Motulsky, H. (2007). In GraphPad Prism 5: Statistics Guide. *GraphPad Software Inc. Press, San Diego CA*, 94.). From the dose-response curve the  $\text{IC}_{50}$  value (i.e. the amount of formaldehyde added that decreased the maximum **3** yield after 24 h to 50%) was 1.4 M, initial concentration in reaction.

***Influence of the metal cofactor in the aldol addition of pyruvate to formaldehyde. Aldol adducts 3 and 6 distribution as a function of the metal cofactor (Figure S6).***

Formaldehyde (1 mmol, 81  $\mu$ L of the 12.3 M commercial aqueous solution, 1 M in the reaction mixture) was dissolved in 50 mM sodium phosphate buffer pH 7.0 (0.5 mL) containing sodium pyruvate (1 M). The reactions were started by addition of different divalent cations ( $\text{Ni}^{2+}$ ,  $\text{Mg}^{2+}$ ,  $\text{Zn}^{2+}$ ,  $\text{Co}^{2+}$  and  $\text{Mn}^{2+}$  at 1 mM final concentration in the reaction mixture) and MBP-YfaU (0.5 mL, 2 mg lyophilized powder  $\text{mL}^{-1}$  in the reaction mixture). The reactions were stirred (1000 rpm vortex mixer) at 25  $^{\circ}\text{C}$  and analyzed by NMR after 24 h. All reactions were conducted in deuterated water.

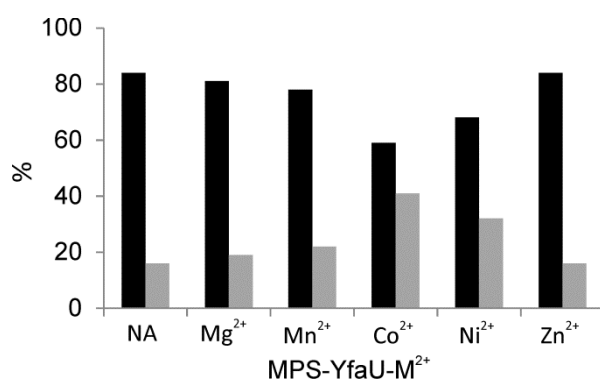

**Figure S6.** MBP-YfaU-M<sup>2+</sup>-catalyzed aldol addition of pyruvate to formaldehyde. Influence of the metal cofactor on the product selectivity. Black bars represent compound **3**, grey bars compound **6**; NA: no metal cofactor added to the original MBP-YfaU(Mg<sup>2+</sup>) enzyme sample, the enzyme partially keeps its natural Mg<sup>2+</sup> cofactor from the bacterial growth medium, during purification with IMAC and dialysis against 10 mM sodium phosphate buffer pH 7.0 at 4  $^{\circ}\text{C}$ .

***Effect of metal on the aldol addition of 4-hydroxy-2-oxobutanoate (3) to formaldehyde (Figure S7).*** Formaldehyde (0.35 mmol, 28  $\mu$ L from the commercial aqueous solution of 12.3 M) was added to a solution of **3** (500  $\mu$ L of a 700 mM solution in 50 mM sodium phosphate buffer pH 7.0). The reactions were started by addition of the metal (0.5 mmol, 5  $\mu$ L of a 0.1 M stock solution). Final volume 533  $\mu$ L. The reactions were stirred (1000 rpm vortex mixer) at 25  $^{\circ}\text{C}$  and analyzed by HPLC after 24 h.

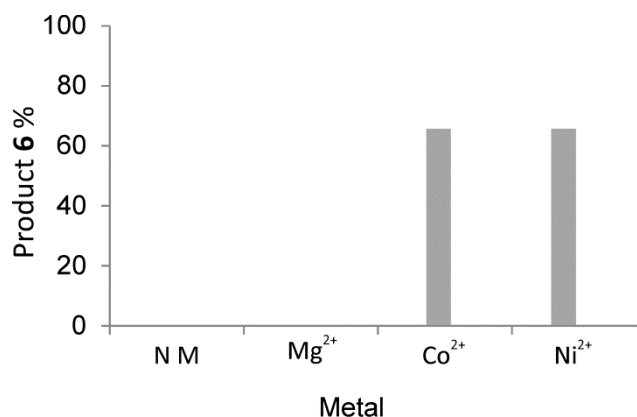

**Figure S7.** Metal-catalyzed aldol addition of aldol adduct **3** to formaldehyde (**1**). Influence of the metal on the **6** yield. N M: No metal added

### Synthesis of sodium 4-hydroxy-2-oxobutanoate (**3**).

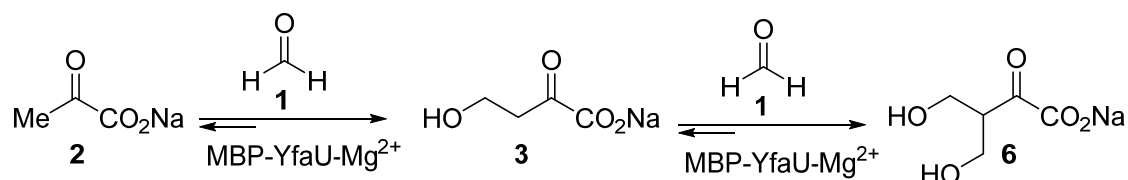

Reaction (7.7 mL total volume) was conducted in a Falcon Tube (15 mL). MBP-YfaU(Mg<sup>2+</sup>) (15.4 mg of protein (i.e., 31 mg of lyophilized powder) 2 mg mL<sup>-1</sup>, 77 U, 10 U mL<sup>-1</sup>) was dissolved in sodium pyruvate (**2**) solution (7.1 mL of a 1.0 M stock solution at pH 6.5-7.0, adjusted with NaOH, 50 mM, 1 M in the reaction). The reaction was initiated by slow addition of formaldehyde (577 µL of a 12.3 M commercial aqueous solution, 115.4 µL each 2 h during 8 h) and shaken in a vortex mixer (1000 rpm) at 25 °C. After 16 h the reaction was centrifuged (5000 g at 4 °C for 30 min) and the MBP-YfaU in the supernatant was eliminated using an Amicon ultrafiltration unit (Millipore, USA, MWCO 10 kDa, 5000 g at 4 °C for 60 min). Solution was frozen at – 80 °C and lyophilized to afford the title compound as a white solid (980 mg, 98% as a **3**:**6** mixture in a 9:1 ratio). Sodium 4-hydroxy-2-oxobutanoate (**3**) <sup>1</sup>H NMR (400 MHz, D<sub>2</sub>O) δ 3.71 (t, *J* = 5.9 Hz, 2H), 2.88 (t, *J* = 5.9 Hz, 2H). <sup>13</sup>C NMR (101 MHz, D<sub>2</sub>O) δ 200.6 (CO), 166.4 (CO<sub>2</sub><sup>-</sup>), 56.0 (CH<sub>2</sub>OH), 41.1 (CH<sub>2</sub>). Sodium 2,2,4-trihydroxybutanoate (hydrate form of **3**). <sup>1</sup>H NMR (400 MHz, D<sub>2</sub>O) δ 3.54 (t, *J* = 6.7 Hz, 2H), 1.95 (t, *J* = 6.7 Hz, 2H). <sup>13</sup>C NMR (101 MHz, D<sub>2</sub>O) δ 174.4 (CO<sub>2</sub><sup>-</sup>), 118.9 (C(OH)<sub>2</sub>), 56.8 (CH<sub>2</sub>OH), 40.1 (CH<sub>2</sub>). Sodium 4-hydroxy-3-(hydroxymethyl)-2-

oxobutanoate (**6**) (10%).  $^1\text{H}$  NMR (400 MHz,  $\text{D}_2\text{O}$ )  $\delta$  3.72 (m, 4H), 3.33 (m, 1H).  $^{13}\text{C}$  NMR (101 MHz,  $\text{D}_2\text{O}$ )  $\delta$  58.6 ( $\text{CH}_2\text{OH}$ ), 52.4 (CH).

Reaction conducted using MBP-YfaU- $\text{Ni}^{2+}$  (15.4 mg of protein,  $2 \text{ mg mL}^{-1}$ , 77 U,  $10 \text{ U mL}^{-1}$ ) pyruvate (1.7 M, final concentration in reaction) and formaldehyde (1.7 M, final concentration in reaction added in one portion) gave sodium 4-hydroxy-2-oxobutanoate (**3**) and sodium 4-hydroxy-3-(hydroxymethyl)-2-oxobutanoate (**6**) in a  $\sim 7:3$  ratio.

### Reductive amination of 4-hydroxy-2-oxobutanoate (**3**). Screening of Transaminases

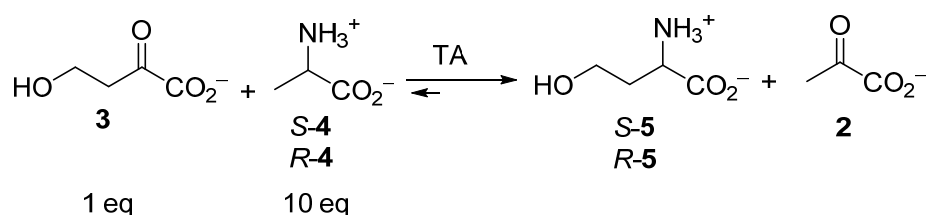

*L-Ala donor (S-4)*. The procedure for sodium 4-hydroxy-2-oxobutanoate (**3**) production necessary for the screening of the transaminases, was identical as described above (i.e. using MBP-YfaU( $\text{Mg}^{2+}$ )) except that it was used directly in solution (0.7-0.8 M).

Reactions ( $300 \text{ }\mu\text{L}$  total volume) were conducted in an Eppendorf tube ( $1 \text{ mL}$ ) and stirred in a vortex mixer ( $1000 \text{ rpm}$ ) at  $25 \text{ }^\circ\text{C}$ . Prozomix TA (2-3 mg of lyophilized solid) was dissolved in  $50 \text{ mM}$  sodium phosphate buffer pH 7.0 ( $104 \text{ }\mu\text{L}$ ) and L-Ala ( $150 \text{ }\mu\text{L}$  of a  $1.8 \text{ M}$  solution in  $50 \text{ mM}$  sodium phosphate buffer pH 7.0,  $0.9 \text{ M}$  final concentration in reaction) was added. The reactions were started by the addition of sodium 4-hydroxy-2-ketobutanoate (**3**) ( $43 \text{ }\mu\text{L}$  of a  $0.7 \text{ M}$  stock solution in  $50 \text{ mM}$  sodium phosphate buffer, pH 7.0,  $0.1 \text{ M}$  final concentration in reaction) and PLP ( $3 \text{ }\mu\text{L}$  of a  $0.1 \text{ M}$  stock solution in water,  $1 \text{ mM}$  final concentration in reaction). After  $24 \text{ h}$ , samples ( $10 \text{ }\mu\text{L}$ ) were mixed with a solution of CbzOSu ( $150 \text{ }\mu\text{L}$  of a  $0.15 \text{ M}$  solution in acetonitrile) and analyzed as described above. The percentage of product formation was determined from the peak areas of the HPLC chromatogram using an external standard method.

*D-Alanine donor (R-4)*. Identical conditions than above but using D-Ala as amine donor

**Determination of equilibrium constant ( $K_{eq}$ ) for the reductive amination of 4-hydroxy-2-oxobutanoic acid (**3**) with L-Ala (**4**) catalyzed by transaminase TR 51 (Figure S8 and S9).**

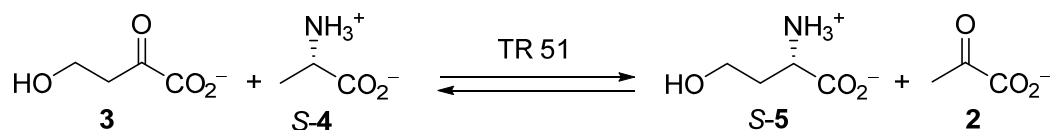

The equilibrium constant of the reaction of **3** and **4** to L-homoserine (**5**) and pyruvate (**2**) was determined according to the method described by Tufvesson et al. 2012.<sup>1</sup> Reactions (200  $\mu$ L total volume) were carried out in 50 mM sodium phosphate buffer pH 7.0, PLP (1 mM) and Prozomix TA 51 (5 mg of solid, 25 mg mL<sup>-1</sup>, 0.7 U, 3.5 U mL<sup>-1</sup>). A preliminary estimation of the equilibrium constant was performed using the concentration data from (Figure S12A):

$$K_{eq}^{estimated} \approx \frac{[L-Homoserine]_{24h}[Pyruvate]_{24h}}{[L-Ala]_{24h}[2-oxoacid]_{24h}} \approx \frac{100mM * 100mM}{300mM * 100mM} \approx 0.3$$

**Equation S1.** Estimation of the transamination equilibrium constant  $K_{eq}^{estimated}$  using the data from Figure S12A.

From the  $K_{eq}^{estimated}$  we established the interval of reaction quotient ( $Q_{0h}$ ) for the precise equilibrium constant determination and observing the change in the reaction quotient  $Q$  after 24 h.

$$\frac{K_{eq}^{estimated}}{10} \leq Q_{0h} \leq 10K_{eq}^{estimated}$$

**Equation S2.** Determination of the interval for  $Q_{0h}$ .

Initial substrate and product concentrations for seven reactions with different reaction quotients were selected (Table S4).

**Table S4.** Substrate and product concentration at the initial start point of the reaction and after 24 h.

|          | C/mM     |          |          |          |           | C/mM     |          |          |          |
|----------|----------|----------|----------|----------|-----------|----------|----------|----------|----------|
| $Q_{0h}$ | <b>3</b> | <b>2</b> | <b>5</b> | <b>4</b> | $Q_{24h}$ | <b>3</b> | <b>2</b> | <b>5</b> | <b>4</b> |
| 3.00     | 10.0     | 128.0    | 5.9      | 25.0     | 0.73      | 15.1     | 120.6    | 2.7      | 30.8     |
| 1.50     | 20.0     | 64.0     | 23.4     | 50.0     | 0.74      | 26.4     | 59.7     | 14.1     | 52.6     |

|       |      |      |       |       |      |      |      |       |       |
|-------|------|------|-------|-------|------|------|------|-------|-------|
| 0.75  | 30.0 | 32.0 | 70.3  | 100.0 | 0.76 | 31.1 | 34.2 | 53.6  | 91.3  |
| 0.38  | 40.0 | 16.0 | 140.6 | 150.0 | 0.79 | 35.8 | 29.6 | 121.1 | 140.4 |
| 0.19  | 50.0 | 8.0  | 234.4 | 200.0 | 0.82 | 38.2 | 27.8 | 205.8 | 185.1 |
| 0.094 | 60.0 | 4.0  | 351.6 | 250.0 | 0.82 | 45.6 | 28.3 | 331.8 | 259.2 |
| 0.047 | 70.0 | 2.0  | 492.2 | 300.0 | 0.85 | 50.5 | 28.6 | 445.8 | 295.8 |

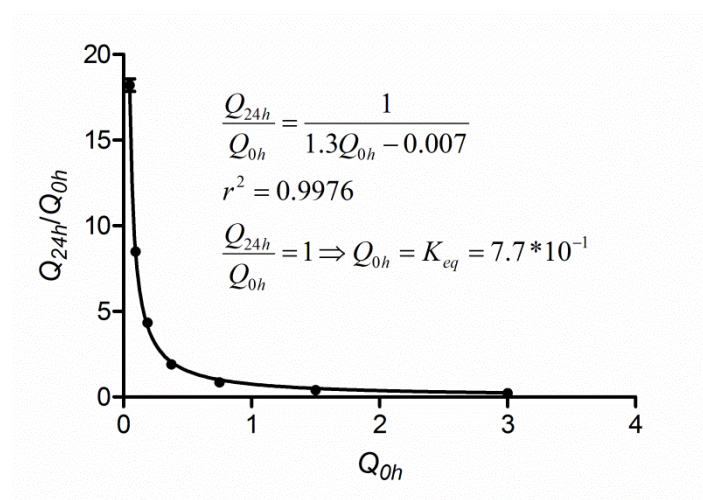

**Figure S8.** Experimental determination of  $K_{eq}$  for the transamination of **3** with L-Ala to yield L-homoserine and pyruvate. The reactants were mixed in different concentrations ( $Q_{0h}$ ) and allowed to react for 24 h.  $Q_{24h}/Q_{0h}$  were plotted against  $Q_{0h}$  and the points were fitted to a hyperbole equation using nonlinear regression. The point at which  $Q_{24h}/Q_{0h}$  equals 1 was the  $K_{eq}$  of the reaction. Data were adjusted using GraphPad Prism 5 software (Motulsky, H. (2007). In GraphPad Prism 5: Statistics Guide. *GraphPad Software Inc. Press, San Diego CA, 94.*)

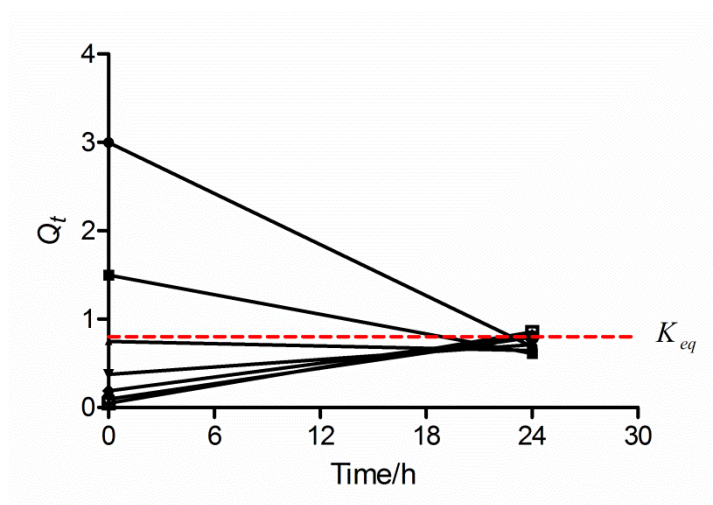

**Figure S9.** Experimental validation of  $K_{eq}$  for the transamination of **3** with L-Ala to yield L-homoserine and pyruvate. The solid lines represent different initial reactant quotients ( $Q$ ) and the dotted line represents the experimentally determined  $K_{eq}$  value. After 24 h the reaction quotient converges in all reactions to  $K_{eq}$ .

**Table S5.** Comparison of equilibrium constant ( $K_{eq}$ ) for the reductive amination of 2-oxoacid or ketones with L-Ala as amino donor.

| Enzymatic reductive amination reaction                                               | $K_{eq}$            | Ref.             |
|--------------------------------------------------------------------------------------|---------------------|------------------|
| 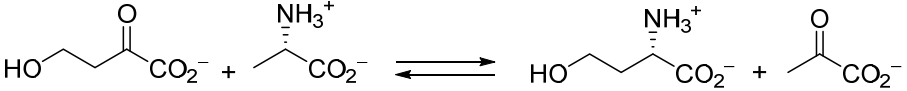   | $7.7 \cdot 10^{-1}$ | This work        |
|     | $2.1 \cdot 10^{-3}$ | Ref <sup>2</sup> |
|    | $4.0 \cdot 10^{-5}$ | Ref <sup>1</sup> |
|  | $6.1 \cdot 10^{-4}$ | Ref <sup>1</sup> |



# One-pot biocatalytic cyclic cascade synthesis of L-homoserine.

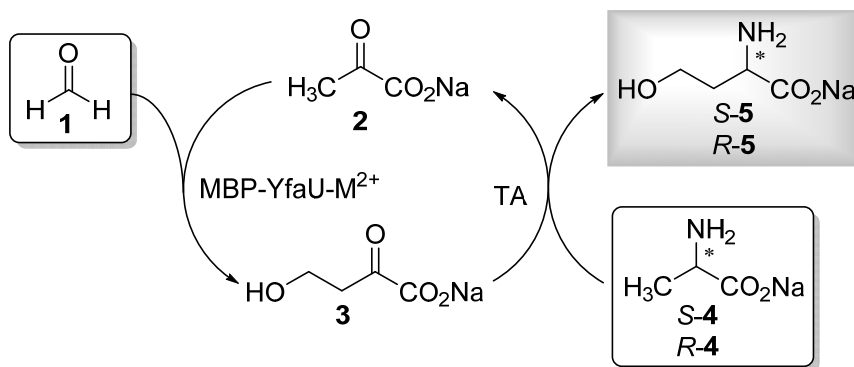

**Scheme 1.** Cyclic cascade one-pot biocatalytic synthesis of L- and D-homoserine. TA: transaminase.

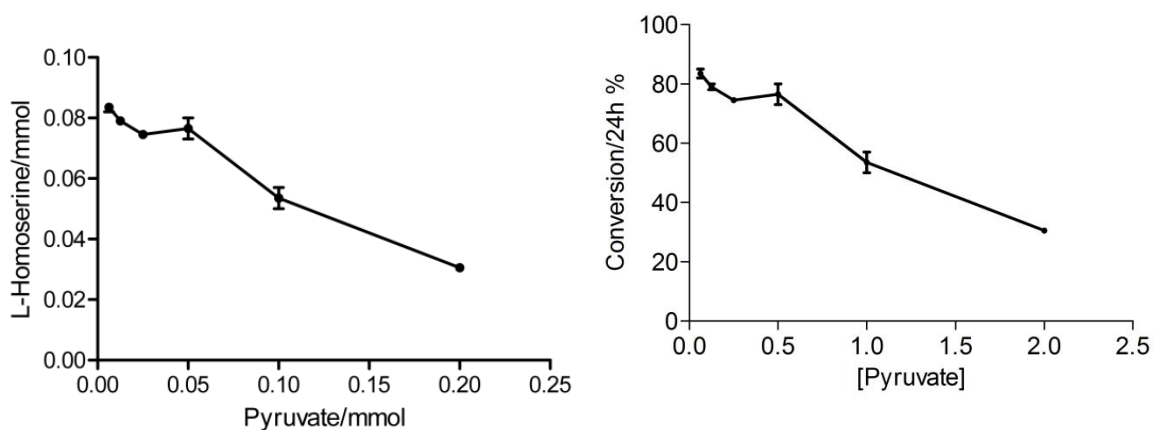

**Figure S10.** Effect of starting **2** concentration (mM) or amount (mmol) on L-homoserine (**S-5**) production. Conditions: reaction volume: 1.0 mL; **S-4** (0.1 mmol), **1** (0.1 mmol, added portion wise 0.0125 mmol each hour, 8 additions), PLP (1 mM), MBP-YfaU (2 mg, 10 U), TA 51 (2.8 U), in 50 mM sodium phosphate buffer pH 7.

**Inhibitory effect of the amount of formaldehyde added each hour (portion wise) on the L-homoserine yield in the one-pot cyclic cascade systems after 24 h of reaction (Figure S11)**

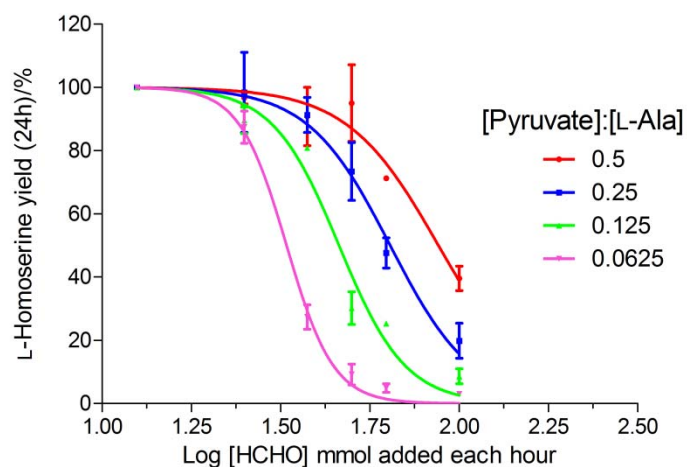

**Figure S11.** Effect of the amount of formaldehyde added each hour on the one-pot cyclic cascade synthesis of L-homoserine yield after 24 h of reaction with Prozomix TA 51. Normalized L-homoserine yield after 24 h vs the Log of the amount of formaldehyde added each hour for different  $[\text{pyruvate}]_0:[\text{L-Ala}]_0$  ratio. From these curves a  $\text{IC}_{50}$  values were calculated. Data were adjusted to inhibitory dose-response model with variable Hill slope using GraphPad Prism 5 software (Motulsky, H. (2007). In GraphPad Prism 5: Statistics Guide. *GraphPad Software Inc. Press, San Diego CA*, 94.). The  $\text{IC}_{50}$  value is the amount of formaldehyde added each hour that decreased the maximum L-homoserine yield to 50% after 24 h for each  $[\text{pyruvate}]_0:[\text{L-Ala}]_0$  ratio:  $\text{IC}_{50}$  (mmol each hour): 0.088 ( $[\text{pyruvate}]_0:[\text{L-Ala}]_0 = 0.5$ ), 0.064 ( $[\text{pyruvate}]_0:[\text{L-Ala}]_0 = 0.25$ ), 0.046 ( $[\text{pyruvate}]_0:[\text{L-Ala}]_0 = 0.125$ ), 0.033 ( $[\text{pyruvate}]_0:[\text{L-Ala}]_0 = 0.0625$ ). For detailed conditions see below.

**A) Synthesis of L-homoserine by portion wise addition of formaldehyde**

The reaction was conducted in an Eppendorf tube (1.5 mL). The reaction volume was 1 mL. MBP-YfaU (4 mg,  $10 \text{ U mL}^{-1}$ ) and transaminase Prozomix TA 51 ( $2.8 \text{ U mL}^{-1}$ ) were dissolved in 50 mM sodium phosphate buffer pH 7.0 (491  $\mu\text{L}$ ). Then, L-Ala (267  $\mu\text{L}$  of a 1.5 M stock solution in 50 mM sodium phosphate buffer pH 7.0, 0.4 M final concentration in the reaction), sodium pyruvate (200  $\mu\text{L}$  of a 1.0 M stock solution in 50 mM sodium phosphate buffer pH 7.0, 0.2 M final concentration

in reaction) and PLP (10  $\mu\text{L}$  of a 100 mM stock solution in 50 mM sodium phosphate buffer pH 7.0, 1 mM final concentration in reaction) were added. The reaction was placed in a vortex mixer (1000 rpm) at 25  $^{\circ}\text{C}$ . The reaction was initiated by slow addition of formaldehyde (4  $\mu\text{L}$  of 12.3 M solution every 1 h, 4 additions of 0.05 mmol during 4 h (i.e., total 0.2 mmol) (Figure S12A), 8 additions, 32  $\mu\text{L}$  total volume added (Figure S12B). Reaction monitoring was carried out by HPLC and the product was quantified using an external standard method (Figure S13). After 24 h the yield of L-homoserine was 50% with respect to the cumulative amount of formaldehyde added.

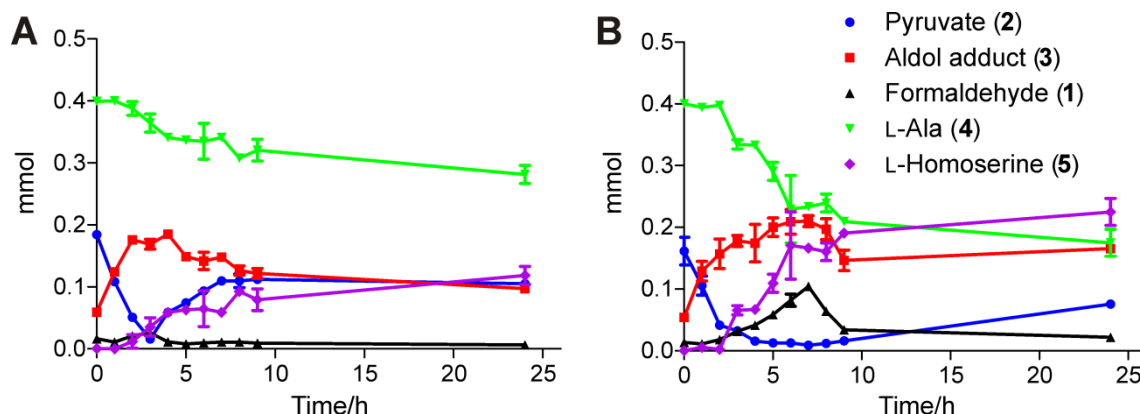

**Figure S12.** Progress of the biocatalytic cyclic cascade synthesis of L-homoserine with formaldehyde added portion wise. Reaction volume: 1 mL; pyruvate (0.2 mmol), L-Ala (0.4 mmol), MBP-YfaU- $\text{Mg}^{2+}$  (10  $\text{U mL}^{-1}$ ) and TA 51 (2.8  $\text{U mL}^{-1}$ ) PLP (1 mM), in 50 mM sodium phosphate buffer pH 7. **A)** Formaldehyde: 4 additions of 0.05 mmol during 4 h (i.e., total 0.2 mmol); **B)** Formaldehyde: 8 additions of 0.05 mmol during 8 h (i.e., total 0.4 mmol). Samples were taken each hour immediately after the addition of formaldehyde.

### **B) Synthesis of L-homoserine by continuous addition of formaldehyde**

The reaction was carried out in a Falcon tube (50 mL). Initial amount of pyruvate (2.1 mmol) and L-Ala (4.2 mmol) were dissolved in 50 mM sodium phosphate buffer pH 7.0 containing PLP (1 mM) (Table S6). Then, MBP-YfaU( $\text{Mg}^{2+}$ ) (105 U, 10  $\text{U mL}^{-1}$  in the final volume), Prozomix TA 39 (74 U, 7  $\text{U mL}^{-1}$ ) were added. After that, formaldehyde was constantly added with a syringe pump at 0.57  $\text{mmol h}^{-1}$  (0.18  $\text{mL h}^{-1}$ ) and varying the total addition time (i.e., volume added) in each experiment. The starting reaction volume was different for each experiment to adjust the volume of

formaldehyde solution that has to be added and the final total volume. The total volume in all experiments was 10.5 mL.

**Table S6.** Conditions of the continuous addition of formaldehyde for the study of the effect of the formaldehyde on the yield of L-homoserine.

| Entry | Total HCOH added (mmol) | Starting reaction volume (mL) <sup>a</sup> | Total addition time (h) | Total HCHO solution added (mL) | [HCHO] solution added (M) |
|-------|-------------------------|--------------------------------------------|-------------------------|--------------------------------|---------------------------|
| 1     | 2.1                     | 9.8                                        | 4                       | 0.7                            | 3.0                       |
| 2     | 4.2                     | 9.2                                        | 7                       | 1.3                            | 3.2                       |
| 3     | 6.3                     | 8.5                                        | 11                      | 2.0                            | 3.2                       |
| 4     | 7.3                     | 8.0                                        | 14                      | 2.5                            | 2.9                       |
| 5     | 8.4                     | 7.8                                        | 15                      | 2.7                            | 3.1                       |

<sup>a</sup>50 mM sodium phosphate buffer pH 7.0.

**Isolation, purification and determination of enantiomeric excess of synthesized L- and D-homoserine. Formation of Cbz-L- and -D-homoserine lactone.**

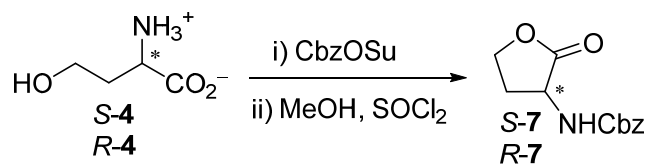

\* (S)- or (R)- depending on stereoselectivity of the transaminase used

**Scheme S2.** Formation of Cbz-L- and -D-homoserine lactone from L- and D-homoserine respectively.

Example from the L-homoserine cyclic synthesis using the conditions of entry 5 (Table S6), the general procedure for purification, formation of Cbz-L-homoserine lactone and determination of enantiomeric excess was as follows. After 24 h, the reaction was filtered through active charcoal (in a filter funnel Pyrex 3, 5 cm Ø, filter bed 1 cm) and the pellet washed with NaHCO<sub>3</sub> 5% (3 x 50 mL). CbzOSu (1.04 g dissolved in CH<sub>3</sub>CN (100 mL) was added to the filtrate (160 mL) and the reaction was stirred at 25 °C. After 12 h, organic solvent was reduced under vacuum and pH of aqueous phase was adjusted to 2.0 with HCl (3 M). The aqueous solution was extracted with AcOEt (3 x 50

mL). The combined organic phases were dried over anhydrous  $\text{MgSO}_4$  and concentrated under vacuum. The residue was dissolved in methanol (150 mL) cooled down at  $-80^\circ\text{C}$ , and thionyl chloride (1.2 mL) was added dropwise. After stirring for 12 h at  $25^\circ\text{C}$ , the solvent and volatile acids were removed under vacuum. The residue solid was absorbed onto silica gel (40 g) and loaded onto a silica column chromatography. The product was eluted with a step gradient of hexane:EtOAc: 100:0, 200 mL, 75:25, 200 mL, 50:50, 200 mL and 25:75, 800 mL. Pure fractions were pooled and the solvent reduced under vacuum affording the benzyl (2-oxotetrahydrofuran-3-yl)carbamate (S)-**7** as white solid: 551 mg, 56% yield (based on initial amount of L-Ala);  $ee > 99\%$ ,  $t_R = 13.3$  min. Chiral HPLC analysis (Figure S14): CHIRALPAK<sup>®</sup> ID 46 x 250 mm column,  $5\ \mu\text{m}$ , isocratic elution hexane/ $\text{CH}_2\text{Cl}_2$ /EtOH 70/10/20 (v/v/v), flow rate  $0.8\ \text{mL min}^{-1}$  at  $20^\circ\text{C}$ , UV detection 209 and 254 nm,  $t_R$  (R) = 11.6 min and  $t_R$  (S) = 13.8 min.  $[\alpha]_D^{20} = -40.1$  ( $c = 0.6$  in DMSO). Data of lactones from authentic samples of L- and D-homoserine:  $[\alpha]_D^{20}$  (R) =  $+40.8$  and  $[\alpha]_D^{20}$  (S) =  $-40.4$ , respectively.  $^1\text{H}$  NMR (400 MHz,  $\text{DMSO}-d_6$ )  $\delta$  7.77 (d,  $J = 8.5$  Hz, 1H), 7.39 – 7.25 (m, 5H), 5.02 (s, 2H), 4.41 (dt,  $J = 11.3, 8.7, 8.7$  Hz, 1H), 4.29 (td,  $J = 8.9, 8.8, 1.5$  Hz, 1H), 4.16 (ddd,  $J = 10.9, 8.7, 6.2$  Hz, 1H), 2.37 (dddd,  $J = 12.0, 9.0, 6.2, 1.5$  Hz, 1H), 2.14 (qd,  $J = 11.4, 11.4, 11.3, 8.9$  Hz, 1H).  $^{13}\text{C}$  NMR (101 MHz,  $\text{DMSO}-d_6$ )  $\delta$  175.8 (CO), 156.2 (NHCO), 137.2 (Carom), 128.8 (Carom), 128.4 (Carom), 128.3 (Carom), 66.1 ( $-\text{CH}_2-$ ), 65.5 ( $-\text{CH}_2-$ ), 50.0 ( $-\text{CH}-$ ), 28.5 ( $-\text{CH}_2-$ ).

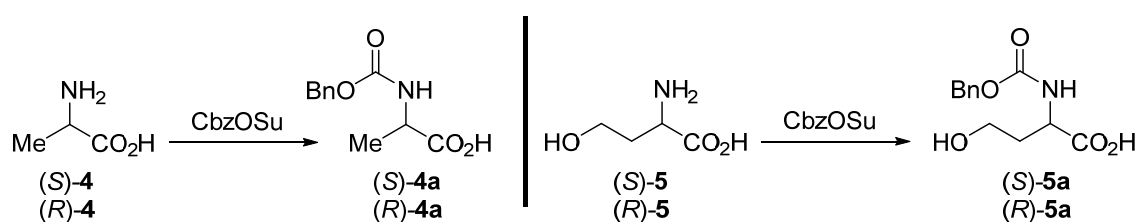

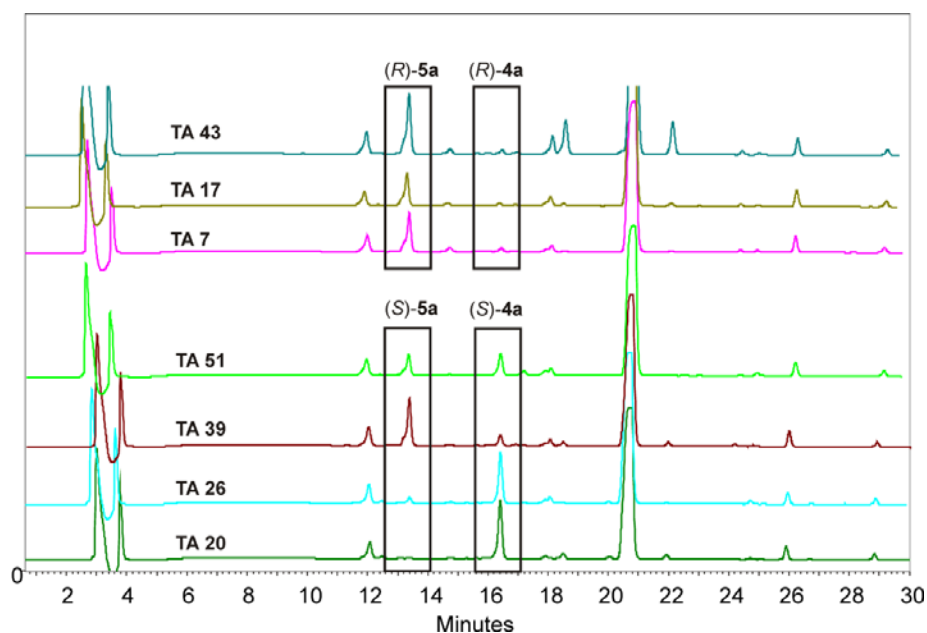

**Figure S13.** HPLC chromatogram of L- and D-homoserine (**5**) synthesis after 24 h of reaction with different Prozomix TA transaminases. In the chromatograms the peak of homoserine, (*R*)-**5a** and (*S*)-**5a**, and the alanine left, (*R*)-**4a** and (*S*)-**4a**, after 24 h is indicated. Reaction conditions.. Initial pyruvate (2.1 mmol) and L- or D-Ala (4.2 mmol), ([Pyruvate]<sub>0</sub>: [L- or D-Ala]<sub>0</sub> ratio = 0.5), were dissolved in 50 mM sodium phosphate buffer pH 7.0 (7.8 mL) containing PLP (10.5 μmol, 1mM in the reaction), MBP-YfaU (100 U) and TA 20 (11.6 U) or TA 26 (33.6 U) or TA 39 (7.4 U) or TA 51 (37.8 U) or TA 7 (480 U) or TA 17 (1160 U) or TA 43 (460 U) depending on the experiment. Formaldehyde dissolved in 50 mM sodium phosphate buffer pH 7.0 was constantly added with a syringe pump at 0.57 mmol h<sup>-1</sup> (0.18 mL h<sup>-1</sup>) total addition time 15 h. The final volume was 10.5 mL.

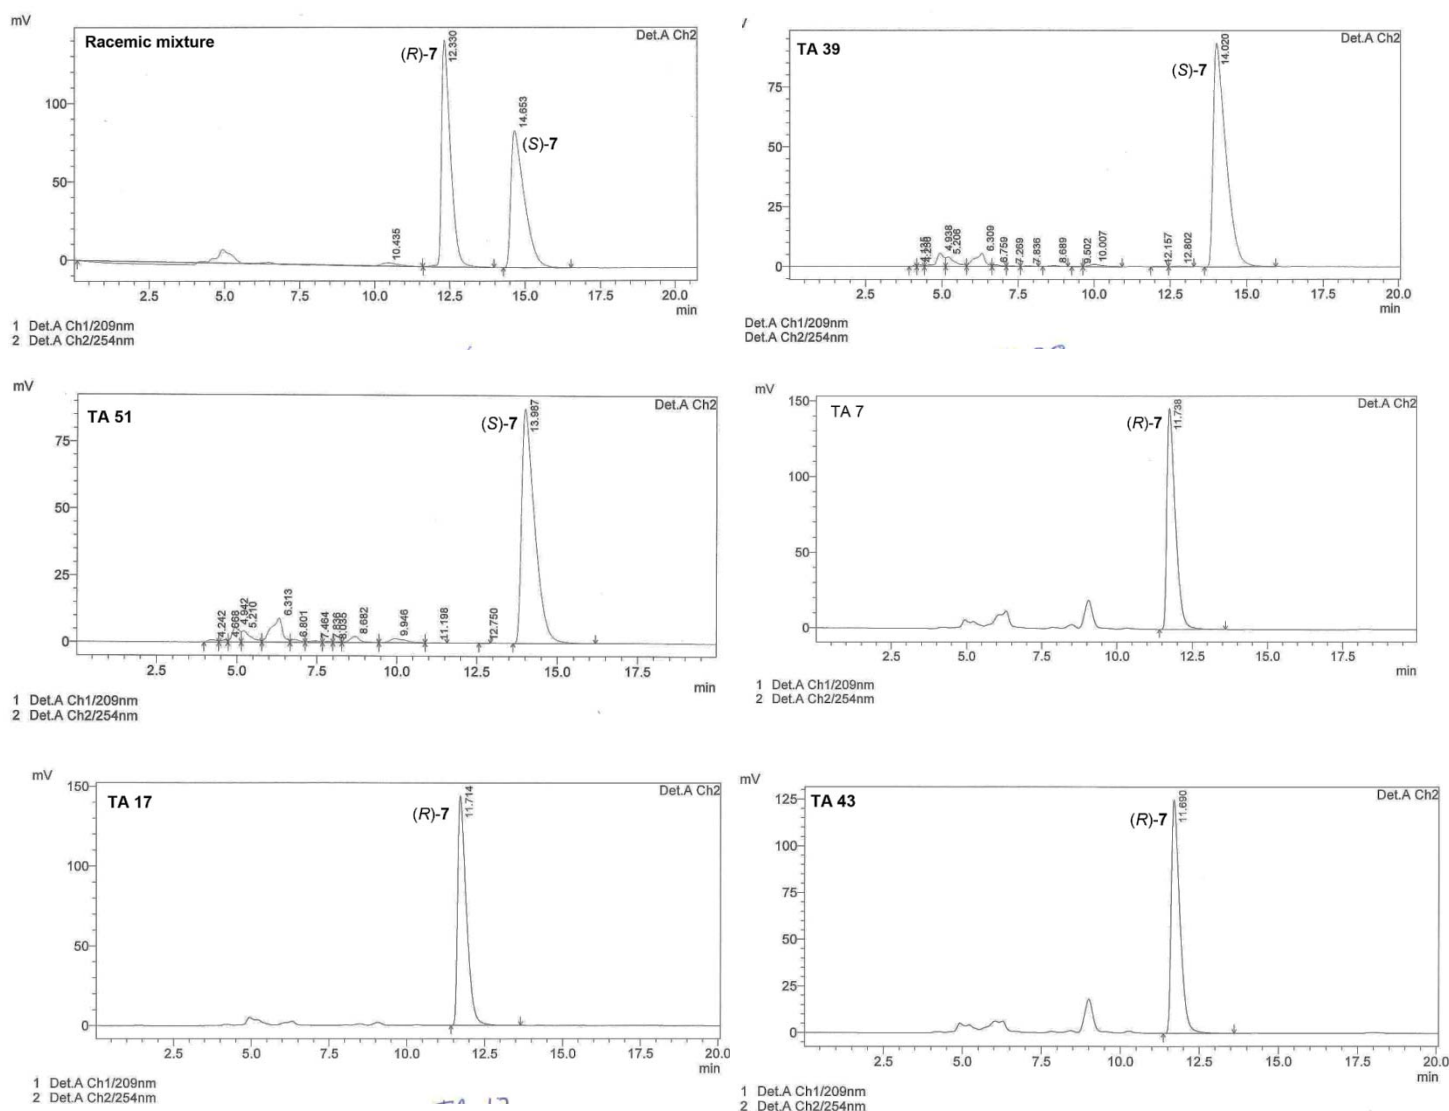

**Figure S14.** HPLC chromatograms of the *N*-Cbz-homoserine lactone derivatives (*S*)-**7** and (*R*)-**7** from the L- and D-homoserine obtained with the (*S*)- and (*R*)-selective transaminases. Analysis were performed in a CHIRALPAK® ID 46 x 250 mm column, 5  $\mu$ m, with isocratic elution system consisting of hexane/CH<sub>2</sub>Cl<sub>2</sub>/EtOH 70/10/20 (v/v/v), flow rate 0.8 mL min<sup>-1</sup> at 20 °C, UV detection 209 and 254 nm,  $t_R$  (*R*) = 11.6 min and  $t_R$  (*S*) = 13.8 min.

a)

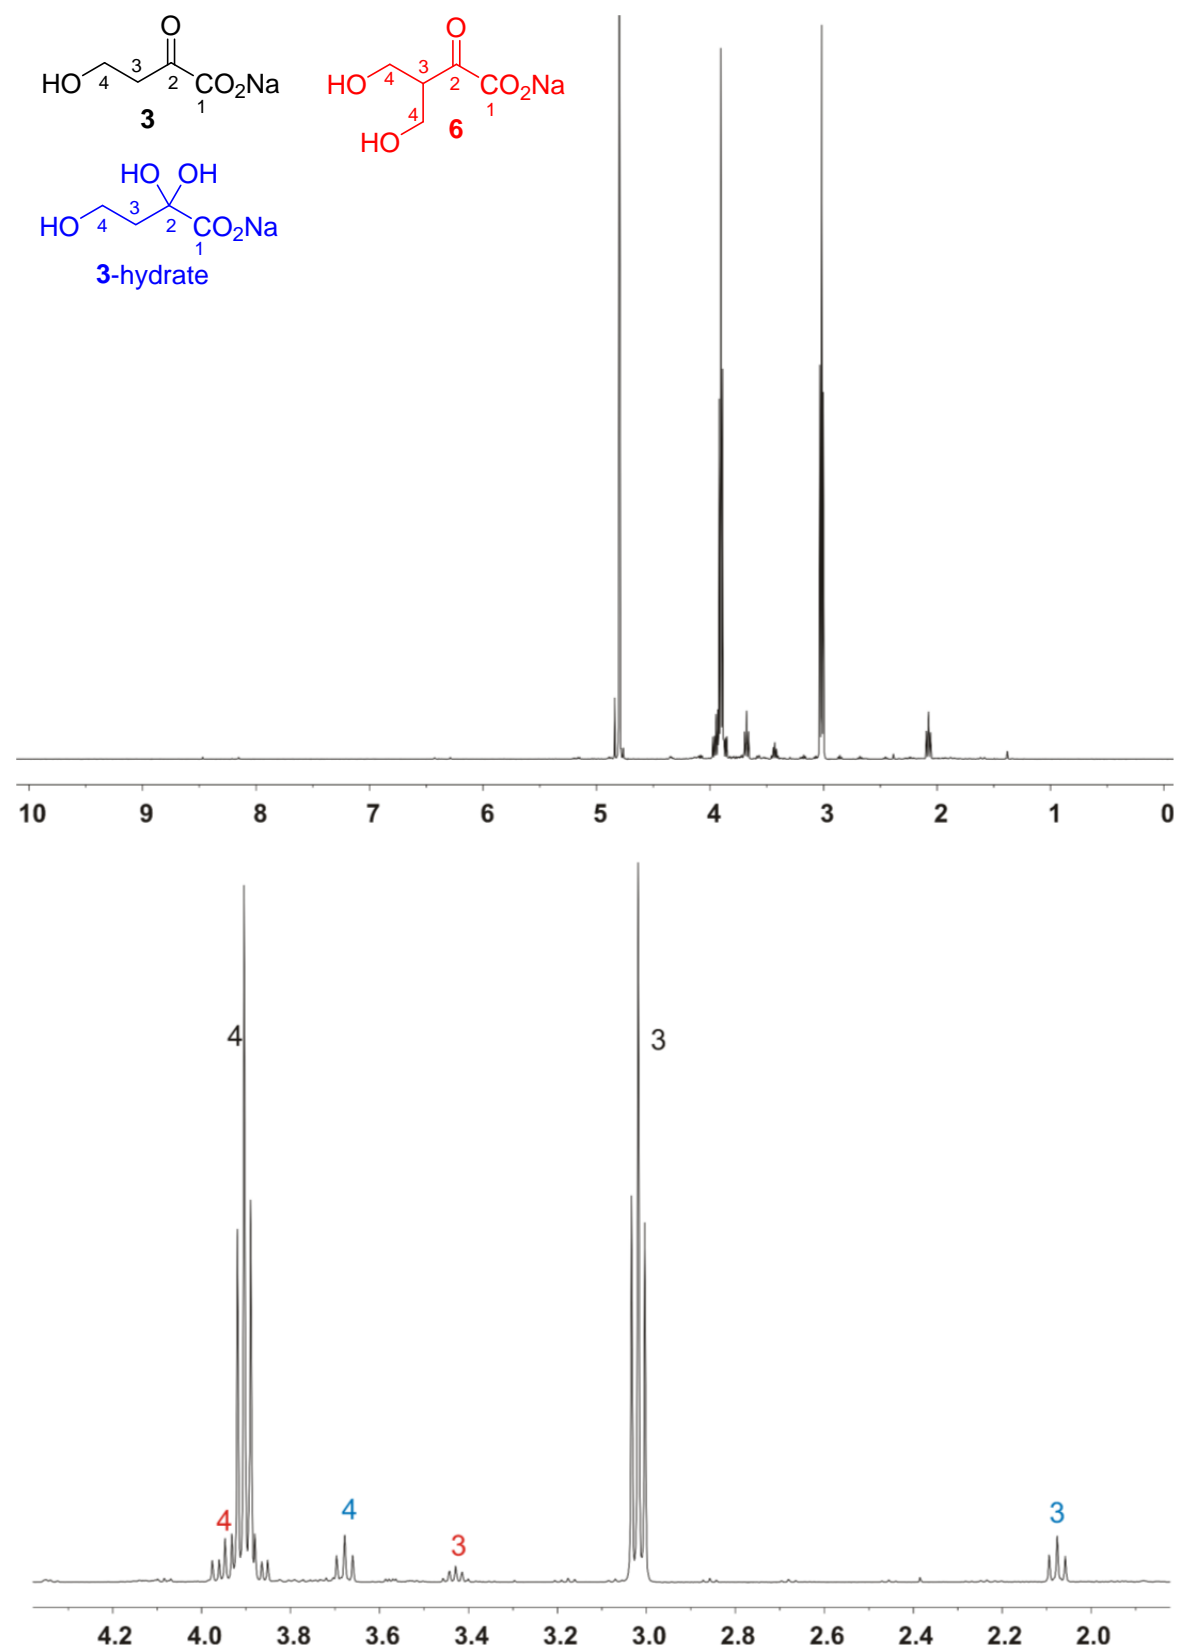



b)

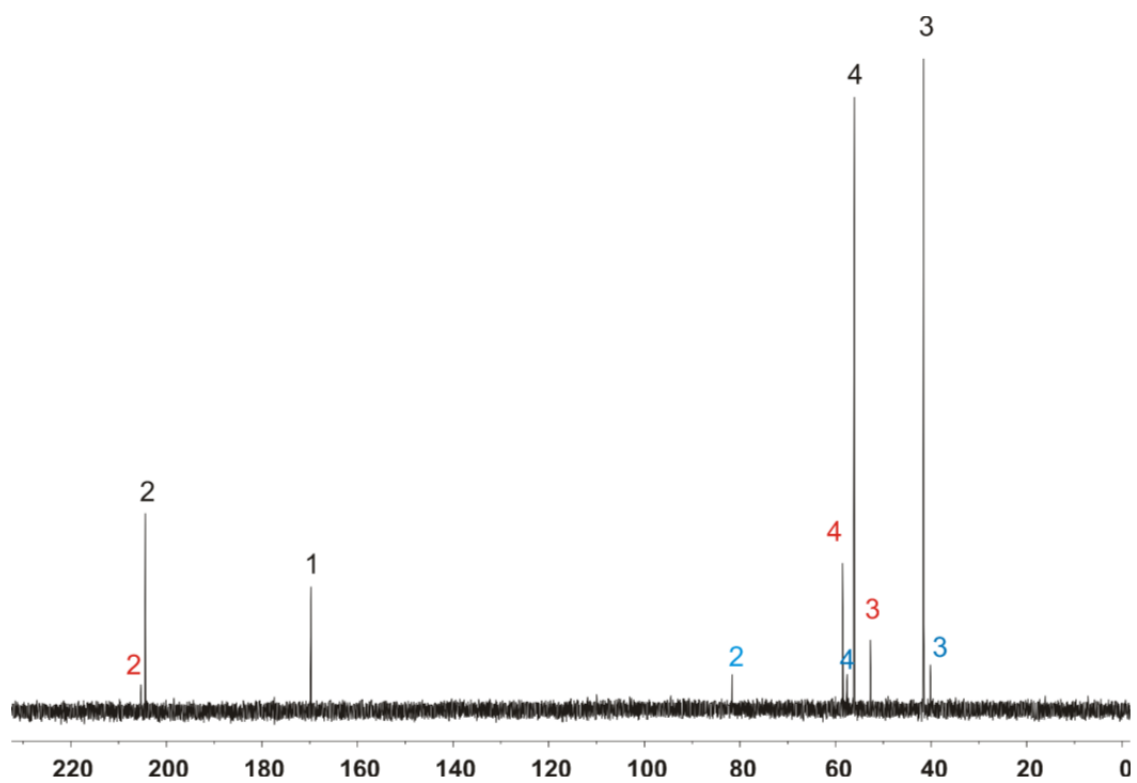

c)

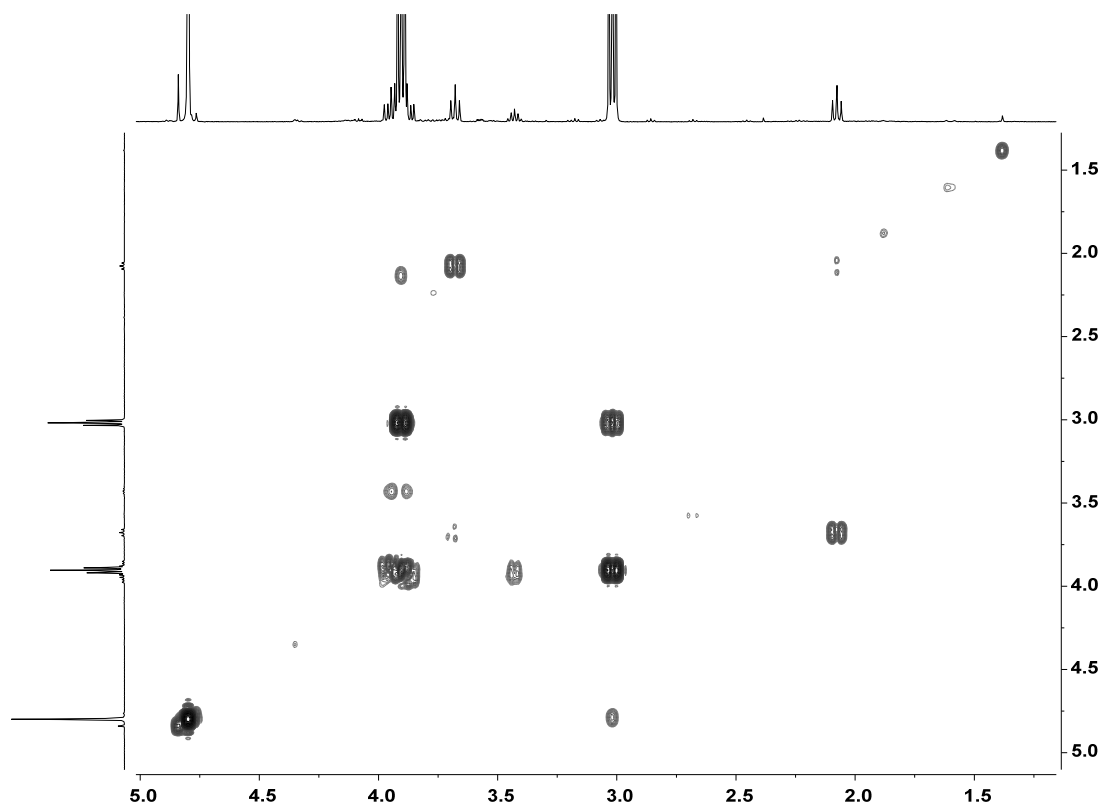

d)

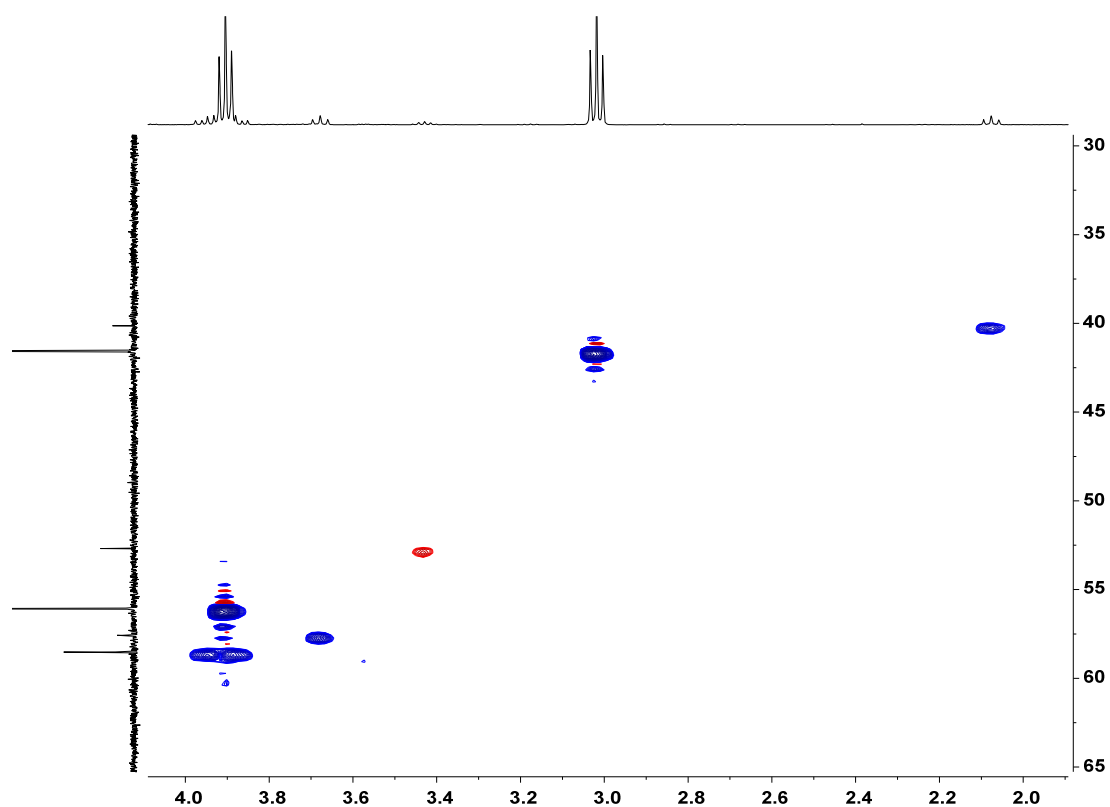

**Figure S15.** NMR spectra ( $D_2O$ ) of compounds **3**, **3-hydrate** and **6** obtained using MBP-YfaU( $Mg^{2+}$ ) as catalyst; a)  $^1H$  NMR, b)  $^{13}C$ , c) 2D COSY, d) 2D HSQC.

a)

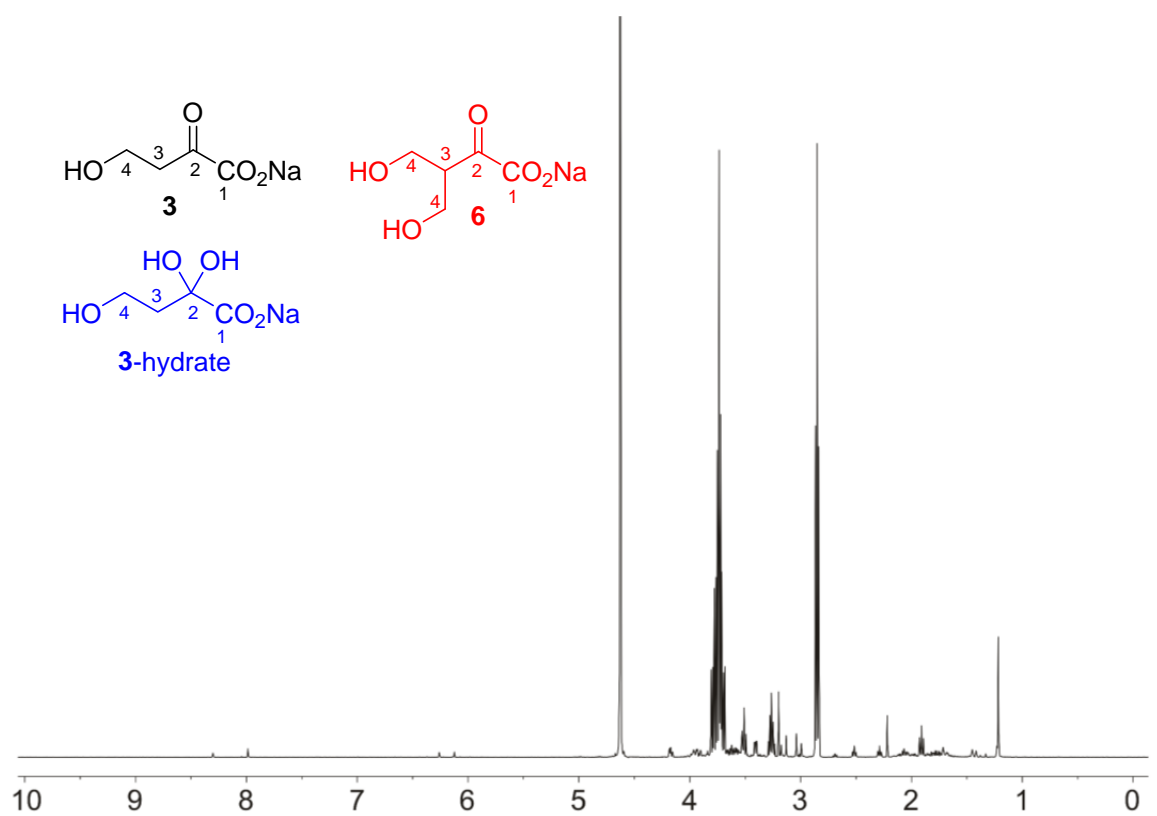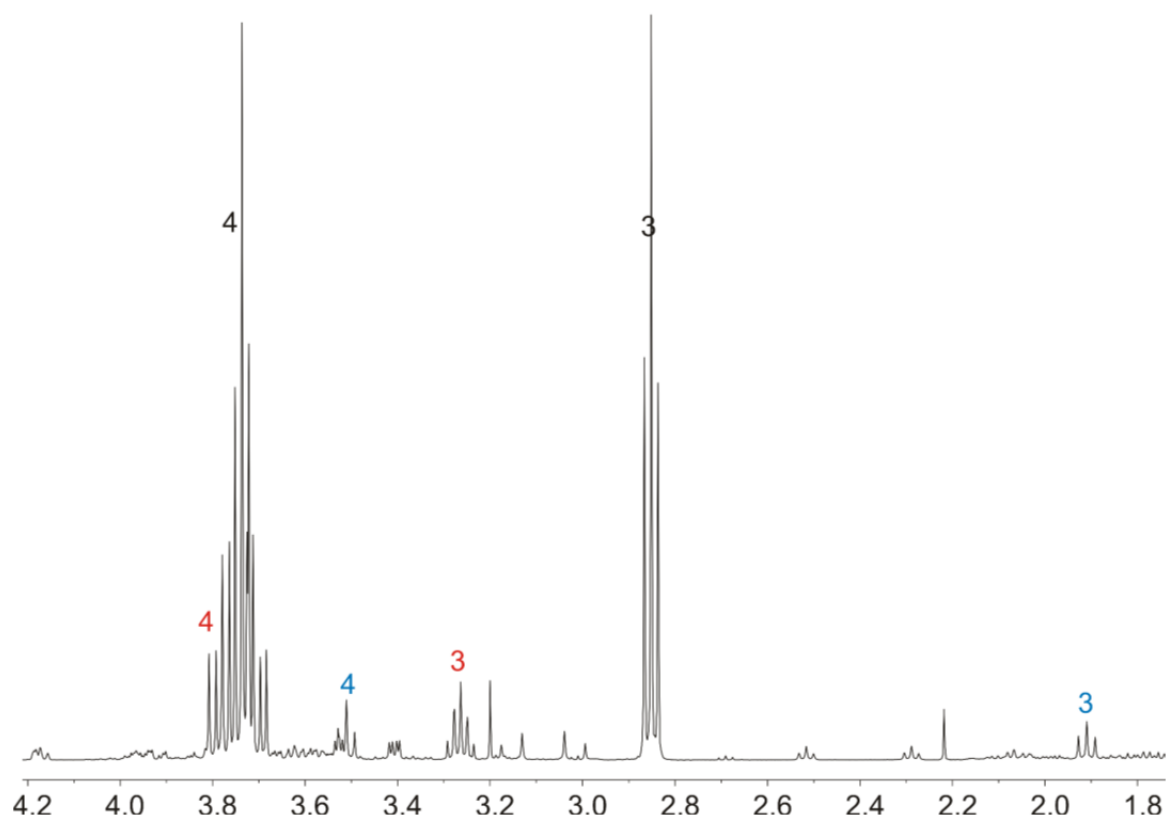

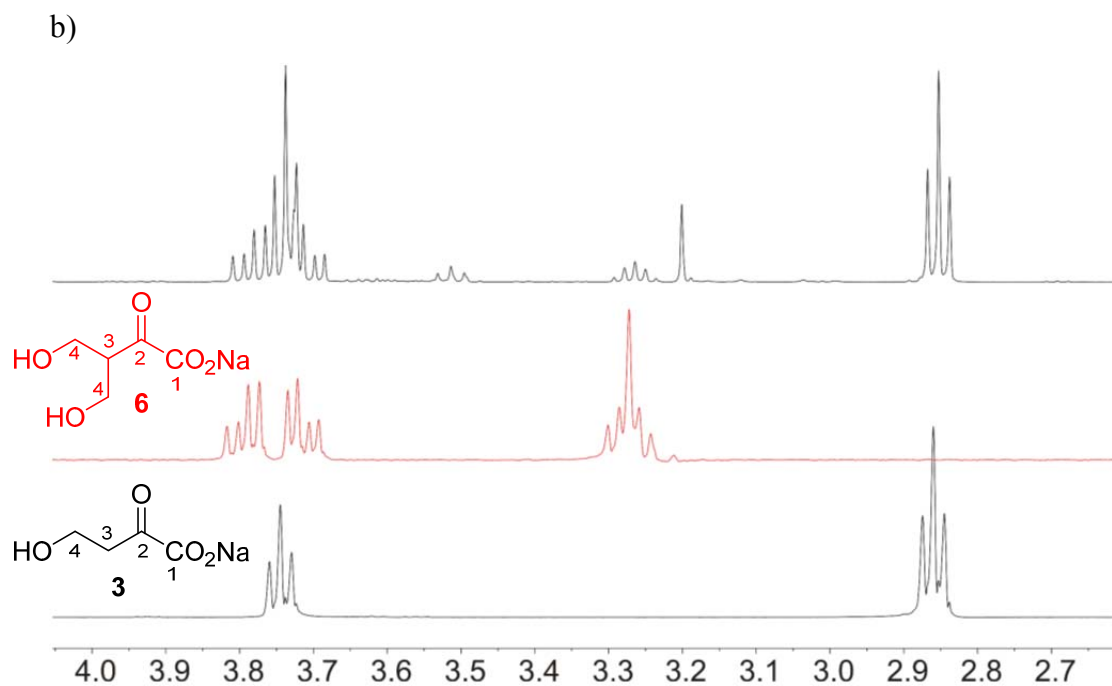

**Figure S16.** NMR spectra ( $D_2O$ ) of compounds **3**, **3-hydrate** and **6** obtained using MBP-YfaU- $Ni^{2+}$  as catalyst; a)  $^1H$  NMR, b) 1D TOCSY.

a)

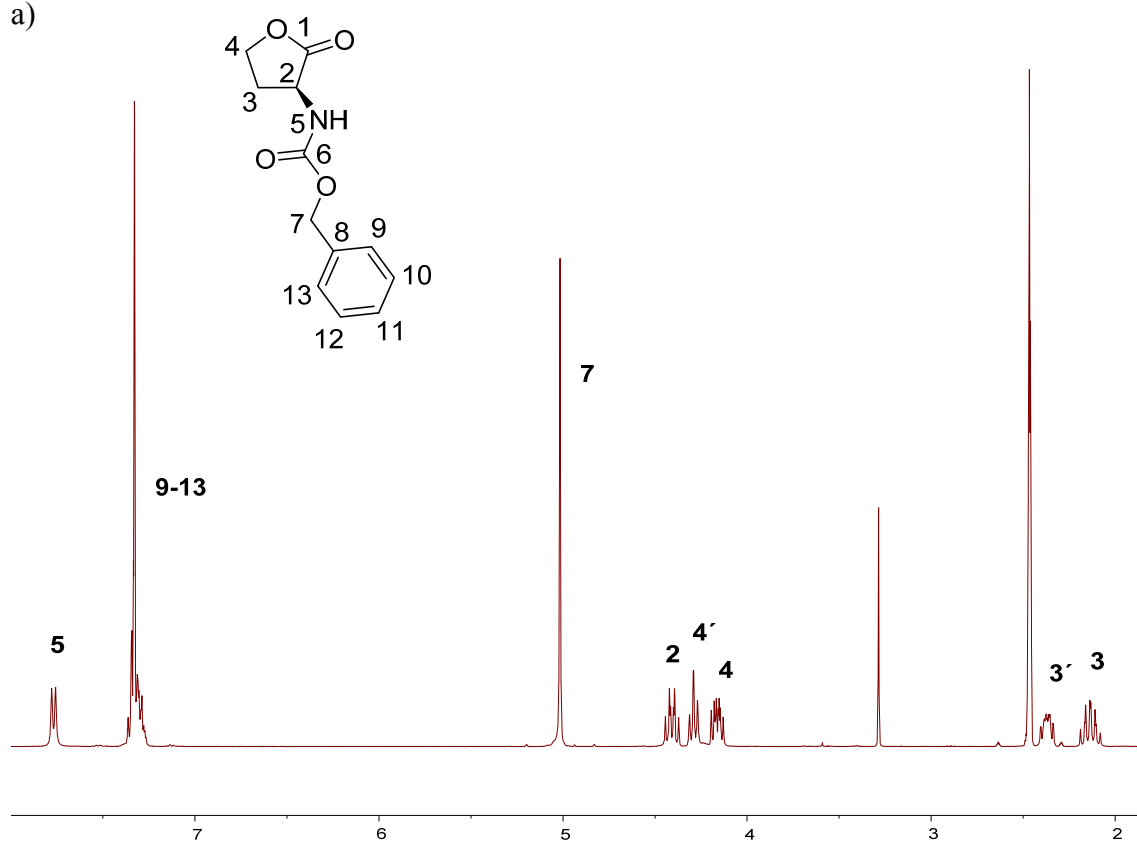

b)

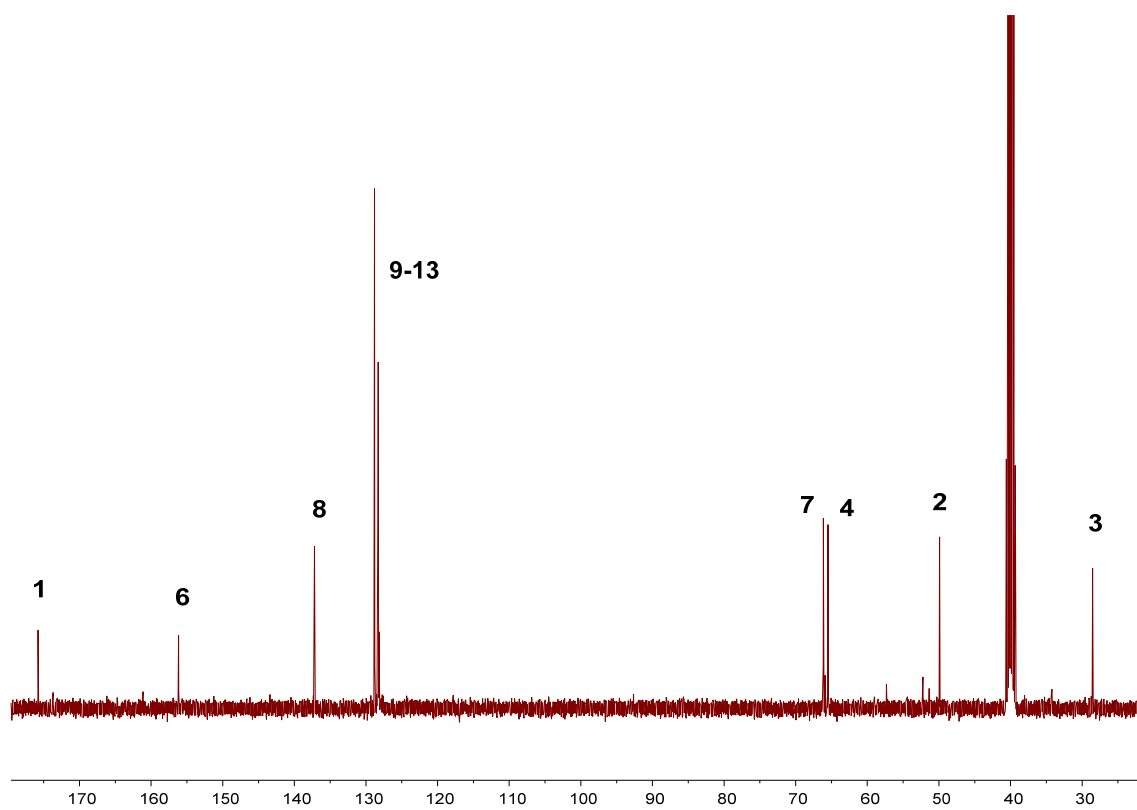

c)

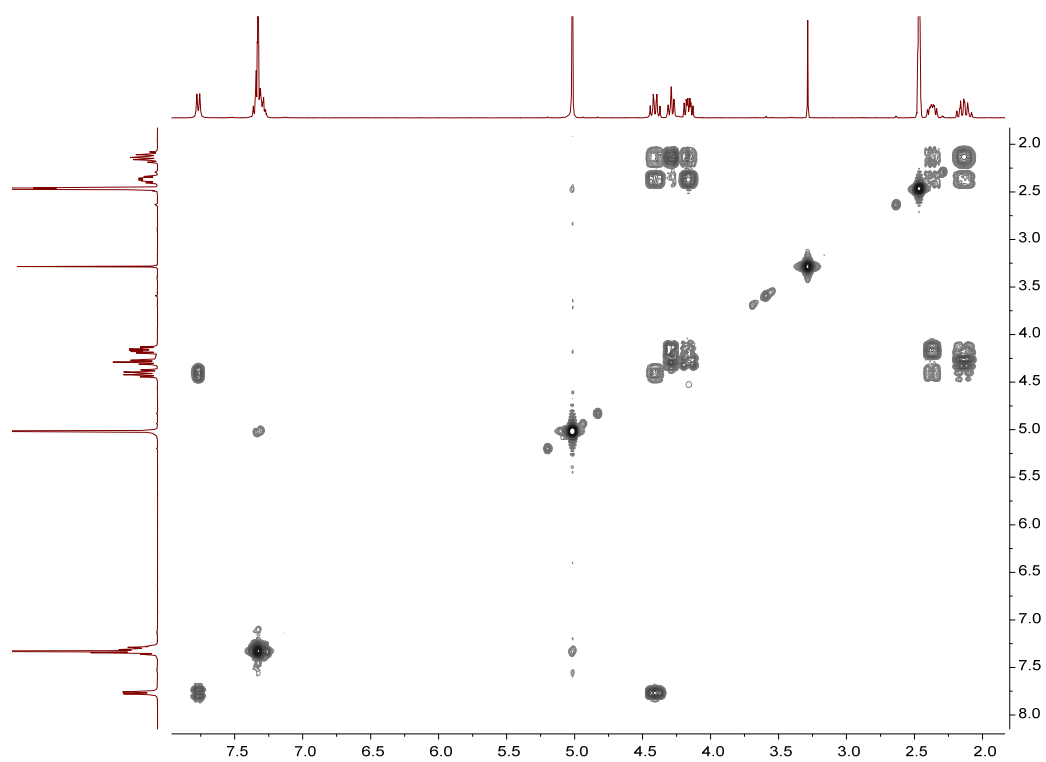

d)

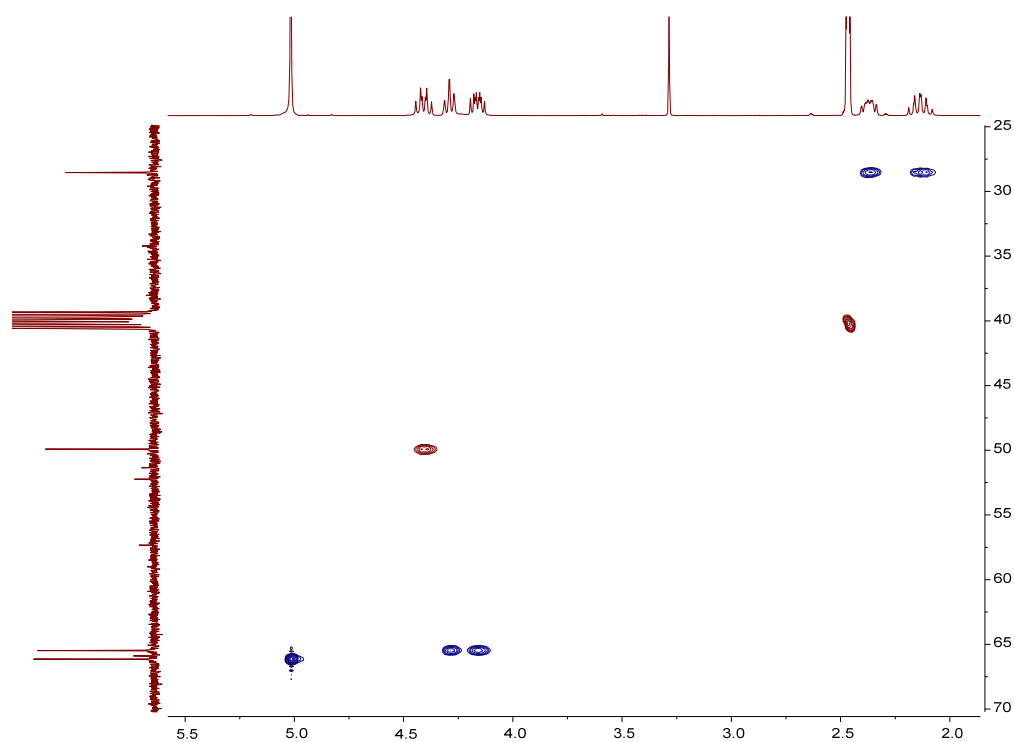

**Figure S17.** NMR spectra (DMSO- $d_6$ ) of Cbz-L-homoserine lactone **7**; a)  $^1\text{H}$  NMR, b)  $^{13}\text{C}$ , c) 2D COSY, d) 2D HSQC.

## References

- (1) Tufvesson, P.; Jensen, J. S.; Kroutil, W.; Woodley, J. M. *Biotechnol. Bioeng.* **2012**, *109*, 2159-2162.
- (2) Sehl, T.; Hailes, H. C.; Ward, J. M.; Wardenga, R.; von Lieres, E.; Offermann, H.; Westphal, R.; Pohl, M.; Rother, D. *Angew. Chem. Int. Ed.* **2013**, *52*, 6772-6775.
